# Supplementary material for: How to approach machine learning-based prediction of drug/compound–target interactions
Source: PubMed Central journal article supplement (PMC9901167; doi:10.1186/s13321-023-00689-w), 2023-02-06
Supplement: 13321_2023_689_MOESM1_ESM.pdf [file 13321_2023_689_MOESM1_ESM.pdf]

# Additional file 1

## How to Approach Machine Learning-based Prediction of Drug/Compound-Target Interactions

Heval Atas Guvenilir<sup>1,2</sup>, Tunca Doğan<sup>1,3,4\*</sup>

<sup>1</sup> Biological Data Science Laboratory, Department of Computer Engineering, Hacettepe University, Ankara, Turkey

<sup>2</sup> Department of Health Informatics, Graduate School of Informatics, METU, Ankara, Turkey

<sup>3</sup> Institute of Informatics, Hacettepe University, Ankara, Turkey

<sup>4</sup> Department of Bioinformatics, Graduate School of Health Sciences, Hacettepe University, Ankara, Turkey

\* To whom correspondence should be addressed, e-mail: [tuncadogan@gmail.com](mailto:tuncadogan@gmail.com)

## Supplementary Tables

**Table S1.** Model performance scores (in terms of MCC) in the small-scale analysis (on the compound-centric datasets) for; **(a)** random forest, and **(b)** SVM models. The 3 best performances for each dataset are shown in bold font. For the results based on other performance metrics please see the supplementary spreadsheets attached as external files named: “small-scale\_rf\_overall\_test\_results.xlsx” and “small-scale\_svm\_overall\_test\_results.xlsx”.

**(a)**

| Model            | ChEMBL id (only the numeric part) of the center compound of each compound cluster |              |              |              |              |              |              |              |              | Mean         | Standard error |
|------------------|-----------------------------------------------------------------------------------|--------------|--------------|--------------|--------------|--------------|--------------|--------------|--------------|--------------|----------------|
|                  | 44                                                                                | 50           | 83           | 91           | 104          | 633          | 808          | 116438       | 295698       |              |                |
| aac              | 0.283                                                                             | 0.112        | 0.359        | 0.238        | 0.413        | 0.199        | 0.227        | 0.099        | 0.195        | 0.236        | 0.035          |
| aac_pssm         | 0.226                                                                             | 0.278        | 0.395        | 0.432        | 0.170        | 0.212        | 0.399        | 0.153        | 0.270        | 0.282        | 0.035          |
| aadp_pssm        | 0.166                                                                             | 0.211        | 0.396        | 0.453        | 0.177        | 0.347        | 0.330        | 0.240        | 0.380        | 0.300        | 0.035          |
| aatp_pssm        | 0.231                                                                             | 0.312        | 0.432        | 0.477        | 0.332        | 0.280        | 0.398        | 0.254        | 0.387        | 0.345        | 0.028          |
| ab_pssm          | 0.237                                                                             | 0.231        | 0.397        | 0.408        | 0.157        | 0.323        | 0.487        | 0.206        | 0.364        | 0.312        | 0.037          |
| apaac            | 0.263                                                                             | 0.262        | 0.463        | 0.346        | 0.303        | 0.514        | 0.422        | <b>0.293</b> | 0.384        | 0.361        | 0.030          |
| cksaagp          | 0.243                                                                             | 0.034        | 0.390        | 0.333        | 0.222        | 0.323        | 0.261        | 0.120        | 0.260        | 0.243        | 0.037          |
| cksaap           | 0.324                                                                             | 0.268        | 0.510        | 0.410        | 0.297        | 0.489        | 0.405        | 0.143        | 0.431        | 0.364        | 0.039          |
| ctdc             | 0.117                                                                             | -0.035       | 0.361        | 0.213        | 0.332        | 0.280        | 0.223        | 0.185        | 0.109        | 0.199        | 0.041          |
| ctdd             | 0.176                                                                             | 0.209        | 0.446        | 0.204        | 0.142        | 0.512        | 0.471        | 0.185        | 0.390        | 0.304        | 0.049          |
| ctdt             | 0.212                                                                             | 0.033        | 0.309        | 0.201        | 0.363        | 0.169        | 0.379        | 0.130        | 0.301        | 0.233        | 0.038          |
| ctriad           | 0.231                                                                             | 0.179        | 0.355        | 0.230        | 0.243        | 0.449        | 0.285        | 0.280        | 0.396        | 0.294        | 0.029          |
| d_fpsm           | <b>0.364</b>                                                                      | 0.288        | 0.429        | 0.371        | 0.398        | 0.518        | 0.492        | 0.250        | 0.345        | 0.384        | 0.029          |
| dde              | 0.302                                                                             | 0.293        | <b>0.528</b> | <b>0.492</b> | 0.356        | 0.512        | <b>0.536</b> | 0.174        | 0.446        | <b>0.404</b> | 0.043          |
| dp_pssm          | 0.279                                                                             | <b>0.376</b> | 0.369        | 0.387        | 0.297        | 0.316        | 0.325        | 0.278        | 0.396        | 0.336        | 0.016          |
| dpc              | 0.318                                                                             | 0.170        | 0.467        | 0.482        | 0.197        | 0.453        | 0.395        | 0.121        | 0.412        | 0.335        | 0.046          |
| dpc_pssm         | 0.227                                                                             | 0.210        | 0.396        | 0.491        | 0.198        | 0.369        | 0.360        | 0.233        | 0.433        | 0.324        | 0.036          |
| edp_pssm         | 0.144                                                                             | 0.172        | 0.375        | 0.388        | 0.164        | 0.141        | 0.358        | 0.152        | 0.273        | 0.241        | 0.036          |
| eedp_pssm        | 0.186                                                                             | 0.225        | 0.419        | 0.433        | 0.164        | 0.310        | 0.336        | 0.022        | 0.262        | 0.262        | 0.043          |
| gaac             | 0.089                                                                             | -0.081       | 0.266        | 0.020        | 0.088        | 0.200        | 0.135        | -0.057       | 0.129        | 0.088        | 0.038          |
| gdpc             | 0.314                                                                             | 0.045        | 0.311        | 0.292        | 0.253        | 0.310        | 0.262        | 0.076        | 0.232        | 0.233        | 0.034          |
| geary            | 0.337                                                                             | 0.182        | 0.390        | 0.394        | 0.294        | 0.339        | 0.360        | <b>0.345</b> | 0.322        | 0.329        | 0.021          |
| gtpc             | 0.304                                                                             | 0.134        | 0.344        | 0.198        | 0.122        | 0.442        | 0.339        | 0.184        | 0.404        | 0.275        | 0.039          |
| k-sep_pssm       | 0.330                                                                             | 0.312        | <b>0.561</b> | 0.326        | <b>0.452</b> | 0.506        | 0.313        | 0.209        | 0.355        | 0.374        | 0.037          |
| ksctriad         | 0.295                                                                             | 0.190        | 0.394        | 0.268        | 0.316        | 0.448        | 0.315        | 0.172        | 0.387        | 0.310        | 0.031          |
| medp_pssm        | 0.167                                                                             | 0.164        | 0.417        | 0.431        | 0.216        | 0.309        | 0.375        | 0.023        | 0.285        | 0.265        | 0.045          |
| moran            | 0.325                                                                             | 0.236        | 0.367        | 0.391        | 0.264        | 0.412        | 0.415        | 0.247        | 0.377        | 0.337        | 0.024          |
| nmbroto          | 0.254                                                                             | 0.190        | 0.365        | 0.444        | 0.277        | 0.327        | 0.344        | 0.195        | 0.391        | 0.310        | 0.029          |
| paac             | 0.230                                                                             | 0.181        | 0.502        | 0.417        | 0.255        | 0.505        | 0.500        | 0.262        | 0.347        | 0.356        | 0.043          |
| pfam             | 0.325                                                                             | 0.286        | 0.486        | 0.432        | 0.430        | 0.203        | 0.273        | 0.132        | 0.399        | 0.329        | 0.039          |
| pse_pssm         | 0.209                                                                             | 0.267        | 0.438        | 0.327        | 0.386        | 0.228        | 0.340        | <b>0.314</b> | 0.396        | 0.323        | 0.026          |
| pssm_ac          | <b>0.371</b>                                                                      | <b>0.379</b> | 0.393        | 0.426        | 0.324        | <b>0.578</b> | 0.451        | 0.210        | <b>0.478</b> | <b>0.401</b> | 0.034          |
| pssm_cc          | 0.293                                                                             | 0.276        | 0.401        | 0.413        | 0.302        | 0.483        | 0.400        | 0.274        | 0.398        | 0.360        | 0.025          |
| pssm_composition | 0.220                                                                             | 0.221        | 0.455        | 0.451        | 0.333        | 0.373        | <b>0.507</b> | 0.142        | 0.437        | 0.349        | 0.043          |
| qso              | 0.229                                                                             | 0.247        | 0.410        | 0.224        | 0.378        | 0.433        | 0.291        | 0.141        | 0.348        | 0.300        | 0.033          |
| random200        | 0.071                                                                             | 0.080        | -0.035       | -0.033       | -0.046       | -0.100       | -0.055       | -0.111       | 0.054        | -0.019       | 0.024          |
| rpm_pssm         | 0.289                                                                             | 0.132        | 0.401        | 0.471        | <b>0.440</b> | 0.410        | 0.358        | 0.189        | 0.422        | 0.346        | 0.039          |
| rpssm            | 0.055                                                                             | 0.197        | 0.355        | 0.456        | 0.187        | 0.340        | 0.418        | 0.087        | 0.338        | 0.270        | 0.048          |
| spmap            | 0.338                                                                             | 0.259        | 0.431        | 0.405        | 0.194        | <b>0.556</b> | 0.489        | 0.153        | <b>0.457</b> | 0.365        | 0.046          |
| taap             | 0.174                                                                             | 0.179        | 0.455        | 0.283        | <b>0.431</b> | 0.442        | 0.402        | 0.102        | 0.309        | 0.309        | 0.044          |
| tpc              | 0.245                                                                             | 0.268        | 0.476        | <b>0.499</b> | 0.270        | 0.529        | <b>0.528</b> | 0.124        | <b>0.448</b> | 0.376        | 0.050          |
| tpc_pssm         | 0.220                                                                             | 0.263        | 0.330        | <b>0.492</b> | 0.352        | 0.241        | 0.356        | 0.241        | 0.412        | 0.323        | 0.030          |
| tri-gram_pssm    | <b>0.350</b>                                                                      | <b>0.349</b> | <b>0.541</b> | 0.362        | 0.426        | <b>0.545</b> | 0.386        | 0.274        | 0.352        | <b>0.398</b> | 0.030          |

(b)

| Model            | ChEMBL id (only the numeric part) of the center compound of each compound cluster |              |              |              |              |              |              |              |              | Mean         | Standard error |
|------------------|-----------------------------------------------------------------------------------|--------------|--------------|--------------|--------------|--------------|--------------|--------------|--------------|--------------|----------------|
|                  | 44                                                                                | 50           | 83           | 91           | 104          | 633          | 808          | 116438       | 295698       |              |                |
| aac              | 0.122                                                                             | 0.049        | 0.183        | 0.102        | 0.243        | 0.279        | 0.091        | 0.161        | 0.136        | 0.152        | 0.025          |
| aac_pssm         | 0.178                                                                             | 0.146        | 0.396        | <b>0.488</b> | 0.285        | 0.306        | 0.378        | 0.144        | 0.242        | 0.285        | 0.040          |
| aadp_pssm        | 0.195                                                                             | 0.142        | 0.360        | 0.287        | 0.218        | 0.254        | 0.394        | 0.132        | 0.359        | 0.260        | 0.032          |
| aatp_pssm        | 0.096                                                                             | 0.180        | 0.390        | 0.392        | 0.311        | 0.305        | 0.471        | 0.132        | 0.262        | 0.282        | 0.042          |
| ab_pssm          | 0.296                                                                             | 0.311        | 0.385        | 0.372        | 0.201        | 0.470        | 0.370        | 0.195        | 0.295        | 0.322        | 0.030          |
| apaac            | 0.159                                                                             | 0.292        | <b>0.508</b> | 0.430        | 0.358        | <b>0.559</b> | 0.438        | 0.200        | 0.300        | 0.360        | 0.045          |
| cksaagp          | 0.215                                                                             | 0.045        | 0.238        | 0.248        | 0.240        | 0.216        | 0.146        | 0.229        | 0.283        | 0.207        | 0.024          |
| cksaap           | 0.329                                                                             | 0.260        | 0.336        | 0.380        | 0.433        | 0.316        | <b>0.491</b> | 0.164        | <b>0.506</b> | 0.357        | 0.036          |
| ctdc             | 0.197                                                                             | -0.055       | 0.280        | 0.225        | 0.353        | 0.158        | 0.134        | 0.079        | 0.121        | 0.166        | 0.039          |
| ctdd             | 0.151                                                                             | 0.226        | 0.375        | 0.357        | 0.225        | 0.310        | 0.414        | 0.237        | 0.024        | 0.258        | 0.041          |
| ctdt             | 0.229                                                                             | -0.013       | 0.233        | 0.099        | <b>0.498</b> | 0.300        | 0.284        | 0.096        | 0.053        | 0.198        | 0.052          |
| ctriad           | 0.171                                                                             | 0.174        | 0.293        | 0.215        | 0.408        | 0.329        | 0.233        | 0.164        | 0.271        | 0.251        | 0.027          |
| d_fpssm          | 0.205                                                                             | 0.123        | 0.242        | 0.388        | 0.025        | 0.140        | 0.394        | 0.033        | 0.362        | 0.212        | 0.048          |
| dde              | 0.307                                                                             | 0.301        | 0.360        | 0.283        | 0.389        | 0.386        | 0.358        | 0.238        | 0.409        | 0.337        | 0.019          |
| dp_pssm          | 0.228                                                                             | <b>0.434</b> | 0.370        | 0.363        | 0.229        | 0.329        | 0.335        | 0.186        | 0.313        | 0.310        | 0.027          |
| dpc              | 0.202                                                                             | 0.106        | 0.308        | 0.291        | 0.236        | 0.333        | 0.263        | 0.193        | 0.337        | 0.252        | 0.025          |
| dpc_pssm         | 0.195                                                                             | 0.142        | 0.418        | 0.287        | 0.218        | 0.254        | 0.394        | 0.132        | 0.358        | 0.266        | 0.035          |
| edp_pssm         | 0.131                                                                             | 0.253        | 0.391        | 0.331        | 0.215        | 0.256        | 0.262        | 0.004        | 0.334        | 0.242        | 0.039          |
| eedp_pssm        | 0.220                                                                             | 0.248        | 0.373        | 0.415        | 0.080        | 0.266        | <b>0.491</b> | 0.059        | 0.283        | 0.271        | 0.048          |
| gaac             | 0.151                                                                             | 0.067        | 0.172        | 0.120        | -0.089       | 0.230        | 0.111        | 0.065        | 0.206        | 0.115        | 0.032          |
| gdpc             | 0.088                                                                             | 0.136        | 0.273        | 0.319        | 0.055        | 0.134        | 0.018        | 0.139        | 0.234        | 0.155        | 0.034          |
| geary            | 0.277                                                                             | 0.201        | 0.357        | 0.327        | 0.308        | 0.288        | 0.280        | 0.195        | 0.358        | 0.288        | 0.020          |
| gtpc             | 0.140                                                                             | 0.056        | 0.135        | 0.060        | 0.105        | 0.212        | 0.243        | <b>0.259</b> | 0.362        | 0.175        | 0.034          |
| k-sep_pssm       | 0.277                                                                             | 0.347        | <b>0.513</b> | 0.288        | 0.418        | 0.474        | 0.456        | 0.241        | 0.312        | <b>0.370</b> | 0.033          |
| ksctriad         | 0.124                                                                             | 0.231        | 0.406        | 0.277        | 0.031        | 0.402        | 0.338        | 0.148        | 0.262        | 0.247        | 0.043          |
| medp_pssm        | 0.198                                                                             | 0.270        | 0.365        | 0.415        | 0.080        | 0.280        | <b>0.491</b> | 0.091        | 0.271        | 0.274        | 0.046          |
| moran            | 0.264                                                                             | 0.215        | 0.345        | 0.347        | 0.181        | 0.315        | 0.384        | 0.184        | 0.303        | 0.282        | 0.025          |
| nmbroto          | 0.231                                                                             | 0.228        | 0.354        | 0.289        | 0.439        | 0.282        | 0.386        | 0.236        | 0.258        | 0.300        | 0.025          |
| paac             | 0.257                                                                             | 0.268        | 0.480        | 0.314        | 0.246        | <b>0.528</b> | 0.443        | 0.167        | 0.338        | 0.338        | 0.040          |
| pfam             | 0.288                                                                             | 0.328        | 0.478        | <b>0.452</b> | 0.327        | 0.353        | 0.432        | <b>0.367</b> | 0.398        | <b>0.380</b> | 0.021          |
| pse_pssm         | 0.248                                                                             | 0.280        | 0.367        | 0.334        | 0.144        | 0.348        | 0.342        | 0.176        | 0.343        | 0.287        | 0.027          |
| pssm_ac          | 0.331                                                                             | <b>0.353</b> | 0.290        | 0.392        | 0.351        | 0.423        | 0.357        | 0.164        | <b>0.428</b> | 0.343        | 0.027          |
| pssm_cc          | 0.294                                                                             | <b>0.368</b> | 0.484        | 0.311        | <b>0.517</b> | 0.446        | 0.373        | 0.192        | 0.349        | <b>0.370</b> | 0.034          |
| pssm_composition | 0.154                                                                             | 0.204        | 0.386        | 0.411        | 0.257        | 0.419        | 0.376        | 0.114        | 0.348        | 0.297        | 0.039          |
| qso              | 0.220                                                                             | 0.078        | 0.249        | 0.211        | 0.346        | 0.268        | 0.073        | 0.213        | 0.113        | 0.197        | 0.031          |
| random200        | -0.044                                                                            | -0.054       | -0.110       | -0.206       | -0.046       | -0.083       | 0.248        | -0.140       | 0.205        | -0.026       | 0.051          |
| rpm_pssm         | 0.331                                                                             | 0.177        | 0.376        | 0.426        | 0.300        | 0.430        | 0.435        | 0.062        | 0.377        | 0.324        | 0.042          |
| rpssm            | 0.133                                                                             | 0.312        | 0.260        | <b>0.431</b> | 0.249        | 0.305        | 0.361        | 0.076        | 0.361        | 0.276        | 0.038          |
| smap             | <b>0.342</b>                                                                      | 0.260        | 0.486        | 0.254        | 0.249        | <b>0.492</b> | 0.394        | 0.026        | 0.370        | 0.319        | 0.048          |
| taap             | 0.211                                                                             | 0.284        | 0.456        | 0.325        | 0.210        | 0.408        | 0.337        | 0.167        | 0.289        | 0.299        | 0.032          |
| tpc              | <b>0.356</b>                                                                      | 0.218        | 0.417        | 0.354        | 0.300        | 0.419        | 0.269        | 0.239        | 0.418        | 0.332        | 0.026          |
| tpc_pssm         | 0.111                                                                             | 0.260        | 0.285        | 0.232        | 0.237        | 0.276        | 0.264        | 0.209        | <b>0.425</b> | 0.256        | 0.027          |
| tri-gram_pssm    | <b>0.340</b>                                                                      | 0.309        | <b>0.487</b> | 0.368        | <b>0.444</b> | 0.485        | 0.490        | <b>0.284</b> | 0.331        | <b>0.393</b> | 0.028          |

**Table S2.** Model performance scores in the medium-scale analysis (on the mDavis dataset). The best performance for each metric is shown in bold font.

| Model                  | RMSE         | Spearman     | F1-score     | MCC          |
|------------------------|--------------|--------------|--------------|--------------|
| seqvec                 | <b>0.794</b> | <b>0.571</b> | 0.530        | <b>0.445</b> |
| k-sep_pssm             | 0.817        | 0.545        | <b>0.531</b> | 0.434        |
| unirep1900             | 0.823        | 0.541        | 0.510        | 0.418        |
| apaac                  | 0.831        | 0.532        | 0.519        | 0.418        |
| unirep5700             | 0.831        | 0.531        | 0.506        | 0.412        |
| transformer-avg        | 0.839        | 0.519        | 0.508        | 0.410        |
| transformer-pool       | 0.840        | 0.515        | 0.506        | 0.412        |
| qso                    | 0.843        | 0.519        | 0.486        | 0.384        |
| dde                    | 0.845        | 0.508        | 0.480        | 0.384        |
| geary                  | 0.847        | 0.519        | 0.473        | 0.377        |
| protvec                | 0.850        | 0.503        | 0.506        | 0.403        |
| ctdd                   | 0.851        | 0.503        | 0.484        | 0.376        |
| ctriad                 | 0.852        | 0.508        | 0.476        | 0.387        |
| pfam                   | 0.854        | 0.497        | 0.538        | 0.410        |
| taap                   | 0.863        | 0.492        | 0.467        | 0.349        |
| spmap                  | 0.871        | 0.491        | 0.477        | 0.362        |
| random200              | 0.957        | 0.403        | 0.368        | 0.251        |
| random200_random-ecfp4 | 0.968        | 0.388        | 0.346        | 0.235        |

**Table S3.** Model performance scores (in terms of the median corrected MCC) in the large-scale analysis on the protein family specific datasets of; **(a)** the random-split, **(b)** dissimilar-compound-split, and **(c)** the fully-dissimilar-split. The 3 best performances for each protein family are shown in bold font (ran200\_ran-ecfp4: random200\_random-ecfp4, only-ran-ecfp4: only-random-ecfp4). For the results based on other performance metrics please see the supplementary spreadsheet attached as an external file named: “large-scale\_overall\_test\_results.xlsx”.

**(a)**

| Random-split     | epigenetic-regulators | hydrolases   | ion-channels | membrane-receptors | other-enzymes | oxidoreductases | proteases    | transcription-factors | transferases | transporters |
|------------------|-----------------------|--------------|--------------|--------------------|---------------|-----------------|--------------|-----------------------|--------------|--------------|
| apaac            | <b>0.745</b>          | 0.755        | 0.697        | 0.689              | 0.754         | 0.692           | <b>0.735</b> | 0.714                 | 0.696        | 0.728        |
| ctdd             | 0.741                 | 0.747        | 0.700        | 0.686              | <b>0.757</b>  | <b>0.694</b>    | 0.730        | 0.711                 | 0.694        | <b>0.732</b> |
| ctriad           | 0.734                 | 0.749        | 0.701        | 0.686              | 0.752         | <b>0.694</b>    | 0.731        | 0.706                 | 0.694        | 0.726        |
| dde              | 0.741                 | <b>0.756</b> | 0.703        | 0.689              | 0.754         | 0.692           | <b>0.735</b> | 0.709                 | 0.691        | 0.722        |
| geary            | 0.733                 | <b>0.754</b> | 0.701        | <b>0.694</b>       | 0.752         | 0.681           | <b>0.735</b> | <b>0.721</b>          | 0.696        | 0.728        |
| k-sep_pssm       | <b>0.757</b>          | 0.749        | <b>0.709</b> | 0.688              | 0.754         | 0.690           | <b>0.735</b> | 0.706                 | <b>0.704</b> | 0.720        |
| pfam             | 0.678                 | 0.694        | 0.679        | 0.458              | 0.609         | 0.561           | 0.635        | 0.645                 | 0.628        | 0.622        |
| qso              | 0.734                 | <b>0.757</b> | 0.700        | 0.685              | 0.754         | 0.690           | 0.733        | 0.704                 | 0.691        | 0.728        |
| random200        | 0.728                 | 0.751        | 0.687        | 0.680              | 0.746         | 0.685           | 0.734        | 0.709                 | 0.687        | 0.726        |
| spmap            | 0.737                 | 0.748        | 0.697        | 0.682              | <b>0.757</b>  | 0.680           | 0.728        | 0.709                 | 0.683        | 0.720        |
| taap             | <b>0.760</b>          | 0.747        | <b>0.712</b> | 0.687              | 0.750         | 0.693           | <b>0.736</b> | <b>0.721</b>          | 0.700        | <b>0.730</b> |
| protvec          | 0.741                 | 0.742        | 0.703        | <b>0.693</b>       | <b>0.758</b>  | <b>0.696</b>    | 0.733        | 0.714                 | 0.696        | 0.726        |
| seqvec           | <b>0.745</b>          | 0.749        | 0.699        | 0.690              | <b>0.757</b>  | 0.678           | 0.728        | 0.709                 | 0.700        | 0.724        |
| transformer-avg  | 0.736                 | 0.748        | <b>0.707</b> | <b>0.691</b>       | <b>0.760</b>  | 0.681           | 0.734        | 0.701                 | 0.702        | 0.718        |
| transformer-pool | 0.734                 | 0.746        | 0.695        | 0.689              | 0.741         | 0.684           | 0.733        | 0.714                 | 0.694        | <b>0.730</b> |
| unirep1900       | 0.744                 | 0.745        | 0.703        | 0.686              | 0.753         | <b>0.696</b>    | 0.731        | <b>0.716</b>          | <b>0.703</b> | 0.728        |
| unirep5700       | 0.729                 | 0.749        | 0.690        | 0.688              | 0.755         | 0.690           | 0.734        | 0.706                 | <b>0.705</b> | 0.726        |
| only-ecfp4       | 0.591                 | 0.665        | 0.643        | 0.426              | 0.600         | 0.514           | 0.519        | 0.534                 | 0.576        | 0.503        |
| ran200_ran-ecfp4 | 0.382                 | 0.481        | 0.400        | 0.256              | 0.449         | 0.401           | 0.320        | 0.265                 | 0.319        | 0.235        |
| only-ran-ecfp4   | 0.296                 | 0.175        | 0.082        | 0.165              | 0.358         | 0.137           | 0.189        | 0.171                 | 0.224        | 0.173        |

(b)

| Dissimilar-compound-split | epigenetic-regulators | hydrolases   | ion-channels | membrane-receptors | other-enzymes | oxidoreduc-tases | proteases    | transcripti-on-factors | transferase-s | transporter-s |
|---------------------------|-----------------------|--------------|--------------|--------------------|---------------|------------------|--------------|------------------------|---------------|---------------|
| apaac                     | 0.137                 | 0.355        | 0.342        | 0.249              | 0.419         | 0.391            | 0.381        | 0.058                  | <b>0.358</b>  | 0.362         |
| ctdd                      | 0.021                 | <b>0.407</b> | 0.311        | 0.241              | 0.386         | 0.423            | <b>0.391</b> | 0.048                  | 0.342         | 0.405         |
| ctriad                    | 0.045                 | 0.351        | 0.276        | 0.243              | 0.354         | 0.405            | 0.353        | 0.006                  | 0.346         | <b>0.425</b>  |
| dde                       | 0.089                 | 0.371        | 0.327        | 0.223              | 0.359         | 0.398            | 0.341        | 0.071                  | 0.340         | 0.403         |
| geary                     | 0.044                 | 0.375        | 0.291        | 0.242              | 0.397         | 0.400            | <b>0.394</b> | 0.036                  | <b>0.347</b>  | 0.417         |
| k-sep_pssm                | 0.239                 | <b>0.382</b> | 0.419        | <b>0.298</b>       | 0.381         | <b>0.449</b>     | 0.354        | 0.071                  | 0.318         | 0.368         |
| pfam                      | <b>0.455</b>          | 0.329        | <b>0.448</b> | 0.146              | <b>0.452</b>  | 0.339            | 0.319        | <b>0.257</b>           | 0.308         | 0.366         |
| qso                       | 0.247                 | 0.373        | 0.338        | <b>0.278</b>       | 0.345         | 0.356            | 0.369        | 0.071                  | 0.324         | <b>0.419</b>  |
| random200                 | 0.152                 | <b>0.386</b> | 0.273        | 0.266              | 0.348         | 0.409            | 0.341        | 0.103                  | 0.341         | 0.388         |
| spmap                     | 0.158                 | 0.351        | 0.289        | <b>0.274</b>       | 0.361         | 0.395            | 0.383        | 0.036                  | 0.335         | 0.369         |
| taap                      | <b>0.289</b>          | 0.371        | <b>0.434</b> | 0.243              | <b>0.443</b>  | 0.360            | <b>0.398</b> | <b>0.187</b>           | 0.322         | <b>0.438</b>  |
| protvec                   | -0.024                | 0.348        | <b>0.437</b> | 0.222              | 0.363         | 0.381            | 0.366        | <b>0.118</b>           | 0.344         | 0.390         |
| seqvec                    | 0.192                 | 0.349        | 0.310        | 0.228              | 0.374         | <b>0.435</b>     | 0.373        | 0.033                  | <b>0.359</b>  | 0.378         |
| transformer-avg           | 0.075                 | 0.349        | 0.288        | 0.250              | <b>0.447</b>  | <b>0.428</b>     | <b>0.391</b> | 0.043                  | 0.328         | 0.390         |
| transformer-pool          | 0.104                 | 0.348        | 0.364        | 0.258              | 0.411         | 0.402            | 0.357        | 0.061                  | 0.316         | 0.376         |
| unirep1900                | 0.161                 | 0.334        | 0.277        | 0.256              | 0.402         | 0.400            | 0.376        | 0.076                  | 0.329         | 0.370         |
| unirep5700                | 0.061                 | 0.350        | 0.289        | 0.255              | 0.387         | 0.374            | 0.346        | 0.090                  | 0.320         | 0.376         |
| only-ecfp4                | <b>0.428</b>          | 0.244        | 0.243        | 0.168              | 0.419         | 0.281            | 0.307        | 0.058                  | 0.306         | 0.309         |
| ran200_ran-ecfp4          | -0.076                | 0.254        | 0.293        | 0.133              | 0.210         | 0.270            | 0.138        | 0.083                  | 0.178         | 0.284         |
| only-ran-ecfp4            | 0.004                 | -0.020       | 0.018        | 0.001              | -0.028        | -0.015           | -0.008       | 0.016                  | -0.020        | -0.035        |

(c)

| Fully-dissimilar-split | epigenetic-regulators | hydrolases   | ion-channels | membrane-receptors | other-enzymes | oxidoreduc-tases | proteases    | transcripti-on-factors | transferase-s | transporter-s |
|------------------------|-----------------------|--------------|--------------|--------------------|---------------|------------------|--------------|------------------------|---------------|---------------|
| apaac                  | 0.403                 | 0.156        | 0.146        | 0.243              | 0.129         | -0.044           | 0.192        | 0.063                  | 0.300         | <b>0.240</b>  |
| ctdd                   | 0.396                 | 0.132        | -0.074       | 0.253              | 0.162         | 0.074            | 0.207        | 0.101                  | 0.247         | -0.017        |
| ctriad                 | <b>0.420</b>          | <b>0.203</b> | 0.086        | 0.220              | 0.125         | 0.030            | 0.212        | <b>0.238</b>           | 0.273         | <b>0.276</b>  |
| dde                    | 0.375                 | 0.170        | 0.124        | 0.206              | <b>0.232</b>  | -0.050           | 0.195        | 0.150                  | 0.295         | 0.029         |
| geary                  | 0.319                 | 0.160        | 0.155        | 0.195              | 0.172         | 0.044            | <b>0.268</b> | 0.066                  | 0.275         | -0.027        |
| k-sep_pssm             | 0.252                 | 0.181        | 0.157        | 0.137              | 0.043         | 0.052            | -0.134       | 0.086                  | 0.300         | <b>0.297</b>  |
| pfam                   | <b>0.446</b>          | <b>0.208</b> | <b>0.174</b> | <b>0.270</b>       | 0.221         | 0.088            | 0.142        | 0.156                  | 0.301         | 0.198         |
| qso                    | 0.397                 | 0.111        | 0.044        | 0.166              | 0.187         | 0.141            | 0.215        | 0.129                  | 0.300         | 0.202         |
| random200              | 0.289                 | 0.040        | 0.146        | 0.226              | <b>0.282</b>  | 0.070            | 0.149        | 0.051                  | 0.284         | -0.194        |
| spmap                  | 0.361                 | 0.103        | <b>0.182</b> | 0.213              | 0.114         | 0.015            | 0.209        | 0.091                  | 0.287         | 0.118         |
| taap                   | 0.289                 | 0.155        | <b>0.181</b> | <b>0.286</b>       | 0.208         | -0.028           | 0.205        | 0.129                  | 0.310         | 0.194         |
| protvec                | 0.275                 | 0.146        | <b>0.174</b> | 0.235              | 0.131         | 0.077            | 0.184        | <b>0.160</b>           | 0.301         | 0.204         |
| seqvec                 | 0.372                 | 0.154        | 0.032        | 0.155              | 0.199         | 0.018            | 0.046        | 0.150                  | 0.276         | -0.023        |
| transformer-avg        | 0.367                 | 0.129        | 0.058        | <b>0.265</b>       | 0.176         | 0.092            | <b>0.227</b> | 0.144                  | 0.311         | 0.187         |
| transformer-pool       | 0.403                 | 0.148        | -0.052       | 0.244              | 0.079         | <b>0.133</b>     | 0.170        | 0.117                  | <b>0.313</b>  | -0.040        |
| unirep1900             | 0.325                 | 0.186        | 0.143        | 0.217              | 0.205         | <b>0.132</b>     | 0.159        | -0.008                 | <b>0.332</b>  | 0.004         |
| unirep5700             | 0.339                 | 0.154        | 0.143        | 0.204              | 0.229         | <b>0.226</b>     | 0.189        | 0.127                  | <b>0.324</b>  | 0.114         |
| only-ecfp4             | <b>0.426</b>          | <b>0.205</b> | 0.133        | 0.254              | <b>0.240</b>  | 0.016            | <b>0.287</b> | <b>0.169</b>           | 0.294         | 0.172         |
| ran200_ran-ecfp4       | 0.087                 | 0.067        | -0.012       | 0.022              | -0.001        | 0.123            | 0.061        | -0.003                 | 0.057         | 0.032         |
| only-ran-ecfp4         | 0.041                 | -0.003       | -0.013       | 0.001              | 0.010         | -0.031           | -0.019       | 0.001                  | 0.018         | 0.025         |

**Table S4:** Prediction error percentages of transformer-avg models with different thresholds on random, dissimilar-compound, and fully-dissimilar splits of transferases family dataset.

|                                  | PE > 0.5 (%) | PE > 1 (%) | PE > 1.5 (%) | PE > 2 (%) |
|----------------------------------|--------------|------------|--------------|------------|
| <b>Random-split</b>              | 36.6         | 11.8       | 3.6          | 0.9        |
| <b>Dissimilar-compound-split</b> | 69.6         | 40.8       | 17.8         | 6.9        |
| <b>Fully-dissimilar-split</b>    | 64.9         | 39.0       | 22.5         | 10.7       |

PE: Prediction error

**Table S5.** Statistics of the protein family specific datasets used in the large-scale analysis.

| Protein family        | Datapoints |           | Proteins |           | Compounds |           |
|-----------------------|------------|-----------|----------|-----------|-----------|-----------|
|                       | initial    | discarded | initial  | discarded | initial   | discarded |
| epigenetic regulators | 19,219     | 1,055     | 125      | 8         | 10,637    | 276       |
| hydrolases            | 71,996     | 9,051     | 623      | 12        | 56,313    | 7,282     |
| ion channels          | 38,097     | 3,865     | 241      | 26        | 32,376    | 2,073     |
| membrane receptors    | 220,810    | 14,635    | 640      | 3         | 133,440   | 8,357     |
| other enzymes         | 36,857     | 4,007     | 456      | 9         | 21,428    | 3,372     |
| oxidoreductases       | 59,023     | 4,545     | 404      | 2         | 42,338    | 2,895     |
| proteases             | 99,100     | 11,839    | 409      | 20        | 64,688    | 8,369     |
| transcription factors | 25,292     | 216       | 119      | 0         | 17,244    | 80        |
| transferases          | 191,864    | 31,900    | 1,020    | 39        | 124,266   | 18,963    |
| transporters          | 29,165     | 804       | 190      | 2         | 18,493    | 523       |

**Table S6.** Split-based statistics of the protein family specific datasets for; **(a)** the random-split, **(b)** dissimilar-compound-split, and **(c)** the fully-dissimilar-split sets (ratio represents the ratio of train to test).

**(a)**

| Random-split<br>Protein family | Bioactivity datapoints |       |       | Proteins |      |       | Compounds |       |       |
|--------------------------------|------------------------|-------|-------|----------|------|-------|-----------|-------|-------|
|                                | train                  | test  | ratio | train    | test | ratio | train     | test  | ratio |
| epigenetic-regulators          | 16,675                 | 1,489 | 11.2  | 117      | 83   | 1.4   | 9,797     | 1,388 | 7.1   |
| hydrolases                     | 59,021                 | 3,924 | 15.0  | 610      | 304  | 2.0   | 46,575    | 3,851 | 12.1  |
| ion-channels                   | 31,287                 | 2,945 | 10.6  | 213      | 142  | 1.5   | 27,961    | 2,898 | 9.6   |
| membrane-receptors             | 197,919                | 8,256 | 24.0  | 636      | 428  | 1.5   | 121,954   | 8,030 | 15.2  |
| other-enzymes                  | 29,465                 | 3,385 | 8.7   | 442      | 256  | 1.7   | 16,757    | 3,040 | 5.5   |
| oxidoreductases                | 52,277                 | 2,201 | 23.8  | 402      | 240  | 1.7   | 38,277    | 2,169 | 17.6  |
| proteases                      | 83,561                 | 3,700 | 22.6  | 389      | 219  | 1.8   | 54,628    | 3,598 | 15.2  |
| transcription-factors          | 23,498                 | 1,578 | 14.9  | 118      | 80   | 1.5   | 16,465    | 1,529 | 10.8  |
| transferases                   | 150,247                | 9,717 | 15.5  | 980      | 634  | 1.5   | 100,462   | 9,070 | 11.1  |
| transporters                   | 26,313                 | 2,048 | 12.8  | 188      | 114  | 1.6   | 17,141    | 1,958 | 8.8   |

(b)

| Dissimilar-compound-split | Bioactivity datapoints |       |      | Proteins |       |      | Compounds |       |      |
|---------------------------|------------------------|-------|------|----------|-------|------|-----------|-------|------|
|                           | Protein family         | train | test | ratio    | train | test | ratio     | train | test |
| epigenetic-regulators     | 16,763                 | 1,401 | 12.0 | 117      | 52    | 2.3  | 9,536     | 825   | 11.6 |
| hydrolases                | 58,953                 | 3,992 | 14.8 | 597      | 178   | 3.4  | 45,913    | 3,118 | 14.7 |
| ion-channels              | 31,329                 | 2,903 | 10.8 | 208      | 69    | 3.0  | 27,656    | 2,647 | 10.4 |
| membrane-receptors        | 197,652                | 8,523 | 23.2 | 627      | 252   | 2.5  | 118,914   | 6,169 | 19.3 |
| other-enzymes             | 29,325                 | 3,525 | 8.3  | 433      | 157   | 2.8  | 15,428    | 2,628 | 5.9  |
| oxidoreductases           | 52,190                 | 2,288 | 22.8 | 396      | 107   | 3.7  | 37,763    | 1,680 | 22.5 |
| proteases                 | 83,405                 | 3,856 | 21.6 | 383      | 130   | 2.9  | 53,493    | 2,826 | 18.9 |
| transcription-factors     | 23,444                 | 1,632 | 14.4 | 116      | 38    | 3.1  | 16,015    | 1,149 | 13.9 |
| transferases              | 150,216                | 9,748 | 15.4 | 956      | 393   | 2.4  | 98,103    | 7,200 | 13.6 |
| transporters              | 26,273                 | 2,088 | 12.6 | 182      | 63    | 2.9  | 16,545    | 1,425 | 11.6 |

(c)

| Fully-dissimilar-split | Bioactivity datapoints |       |      | Proteins |       |      | Compounds |       |      |
|------------------------|------------------------|-------|------|----------|-------|------|-----------|-------|------|
|                        | Protein family         | train | test | ratio    | train | test | ratio     | train | test |
| epigenetic-regulators  | 16,675                 | 1,489 | 11.2 | 117      | 52    | 2.3  | 9,536     | 825   | 11.6 |
| hydrolases             | 59,021                 | 3,924 | 15.0 | 597      | 178   | 3.4  | 45,913    | 3,118 | 14.7 |
| ion-channels           | 31,287                 | 2,945 | 10.6 | 208      | 69    | 3.0  | 27,656    | 2,647 | 10.4 |
| membrane-receptors     | 197,919                | 8,256 | 24.0 | 627      | 252   | 2.5  | 118,914   | 6,169 | 19.3 |
| other-enzymes          | 29,465                 | 3,385 | 8.7  | 433      | 157   | 2.8  | 15,428    | 2,628 | 5.9  |
| oxidoreductases        | 52,277                 | 2,201 | 23.8 | 396      | 107   | 3.7  | 37,763    | 1,680 | 22.5 |
| proteases              | 83,561                 | 3,700 | 22.6 | 383      | 130   | 2.9  | 53,493    | 2,826 | 18.9 |
| transcription-factors  | 23,498                 | 1,578 | 14.9 | 116      | 38    | 3.1  | 16,015    | 1,149 | 13.9 |
| transferases           | 150,247                | 9,717 | 15.5 | 956      | 393   | 2.4  | 98,103    | 7,200 | 13.6 |
| transporters           | 26,313                 | 2,048 | 12.8 | 182      | 63    | 2.9  | 16,545    | 1,425 | 11.6 |

**Table S7.** Statistics of the compound-centric datasets used in the small-scale analysis.

| Name of the center compound | ChEMBL id of the center compounds | cluster size (total # of compounds) | # of active targets | # of inactive targets |
|-----------------------------|-----------------------------------|-------------------------------------|---------------------|-----------------------|
| Curcumin                    | CHEMBL116438                      | 1648                                | 94                  | 66                    |
| Tamoxifen                   | CHEMBL83                          | 754                                 | 147                 | 35                    |
| Quercetin                   | CHEMBL50                          | 543                                 | 92                  | 64                    |
| Genistein                   | CHEMBL44                          | 479                                 | 102                 | 57                    |
| Econazole                   | CHEMBL808                         | 246                                 | 54                  | 23                    |
| Levoketoconazole            | CHEMBL295698                      | 243                                 | 79                  | 27                    |
| Amiodarone                  | CHEMBL633                         | 194                                 | 73                  | 28                    |
| Miconazole                  | CHEMBL91                          | 170                                 | 49                  | 22                    |
| Clotrimazole                | CHEMBL104                         | 52                                  | 38                  | 37                    |

**Table S8.** Enzyme sub-classes of the protein family specific datasets used in the large-scale analysis.

| <b>Main class EC number(s) of the merged enzyme classes</b> | <b>Names of merged enzyme classes</b>        |
|-------------------------------------------------------------|----------------------------------------------|
| 1                                                           | Oxidoreductases, Cytochrome P450s            |
| 2                                                           | Transferases, Kinases                        |
| 3 (except 3.4)                                              | Hydrolases, Phosphatases, Phosphodiesterases |
| 3.4                                                         | Proteases (a.k.a. Peptidases)                |
| All remaining                                               | Other, Lyases                                |



## Supplementary Figures

(a)

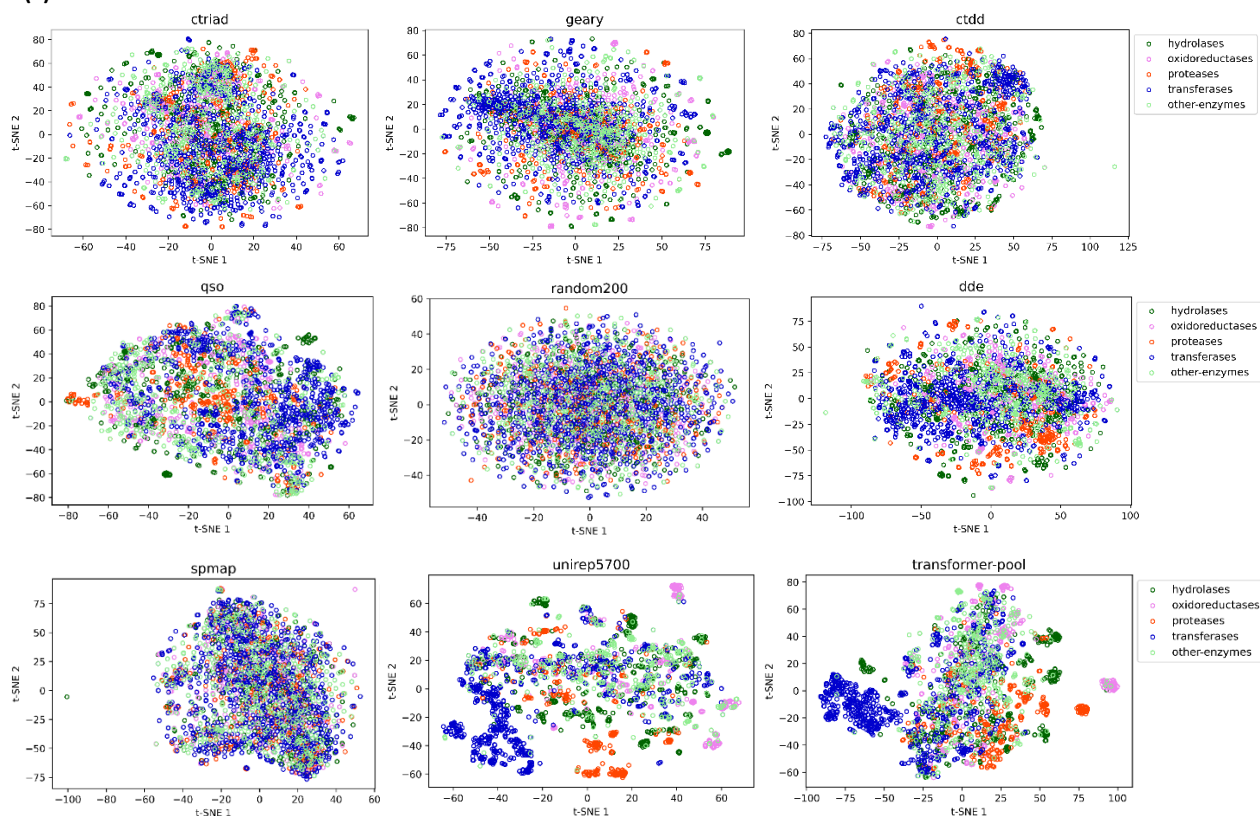

(b)

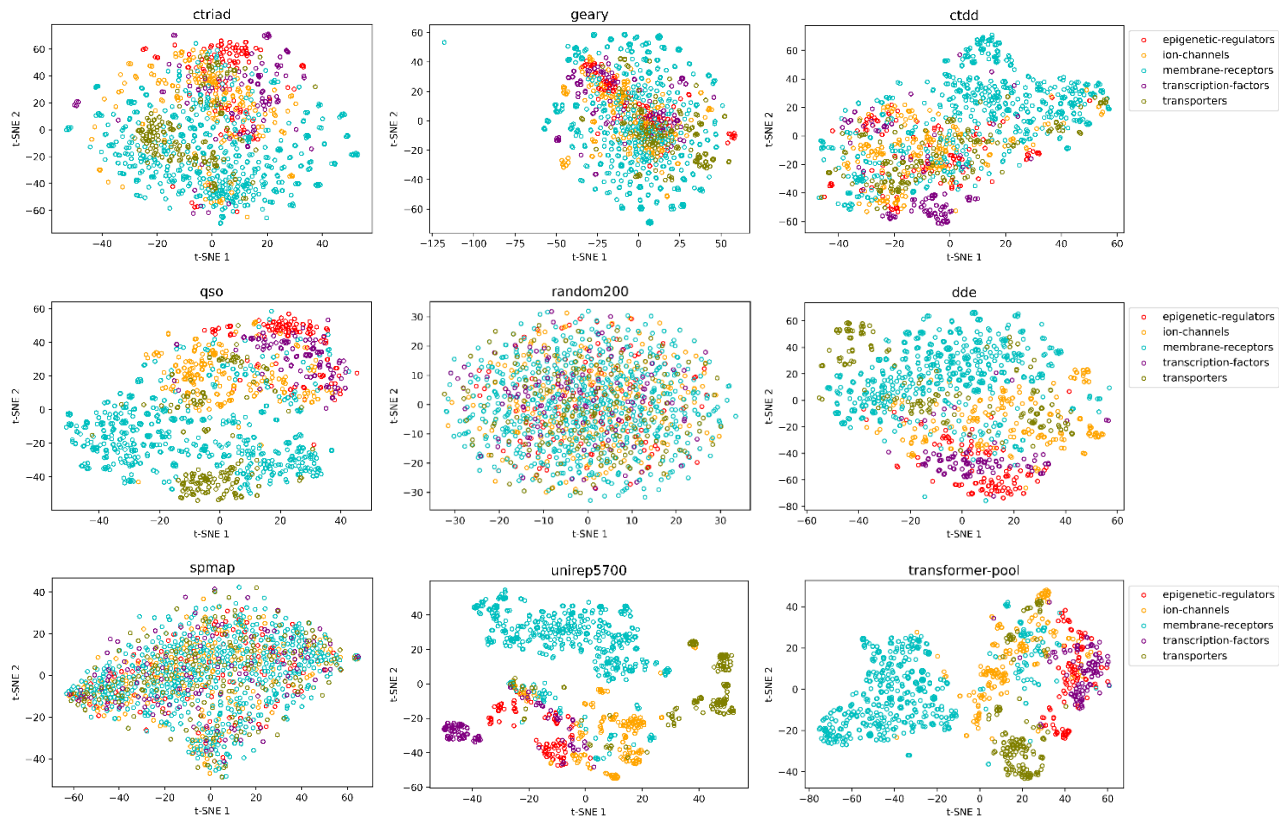

**Figure S1.** t-SNE based visualization of conventional and learned protein representations on; **(a)** enzymes including hydrolases, oxidoreductases, proteases, transferases, and other-enzymes, and **(b)** other protein families (non-enzymes) including epigenetic regulators, ion channels, membrane receptors, transcription factors and transporters.

(a)

Random-split

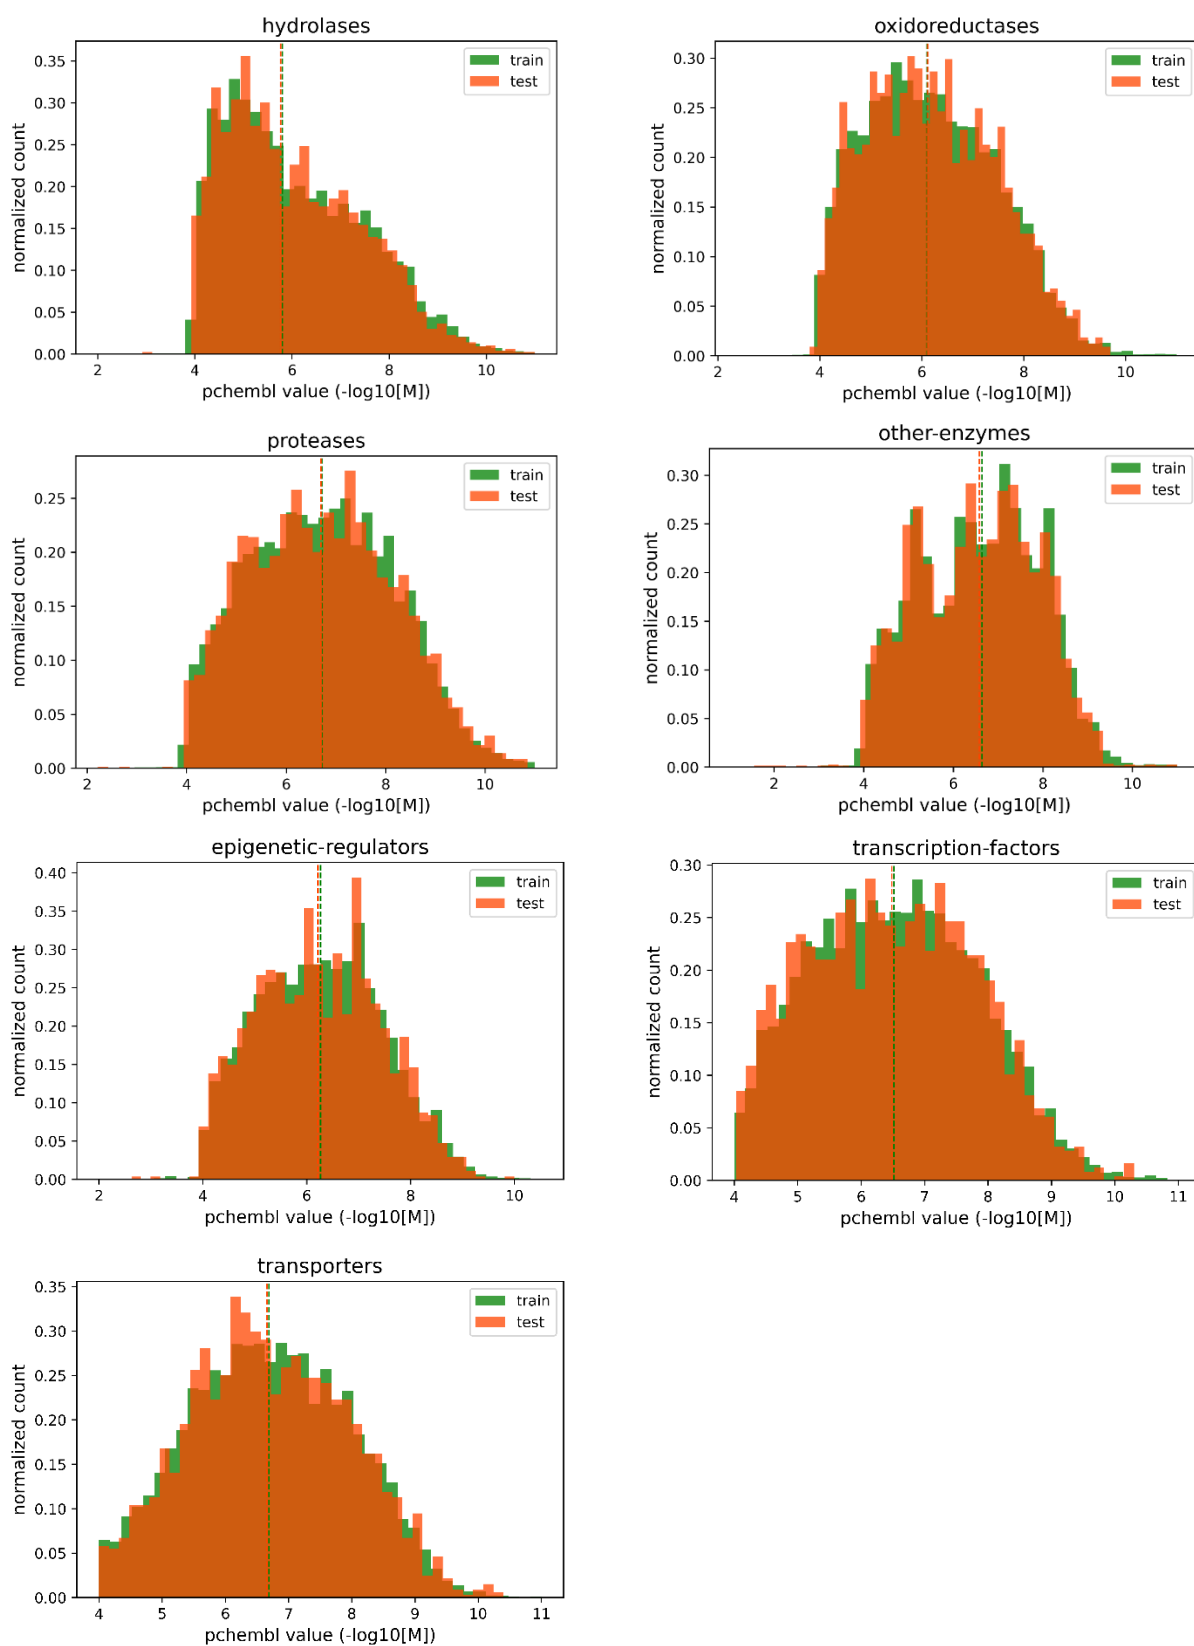

(b)

### Dissimilar-compound-split

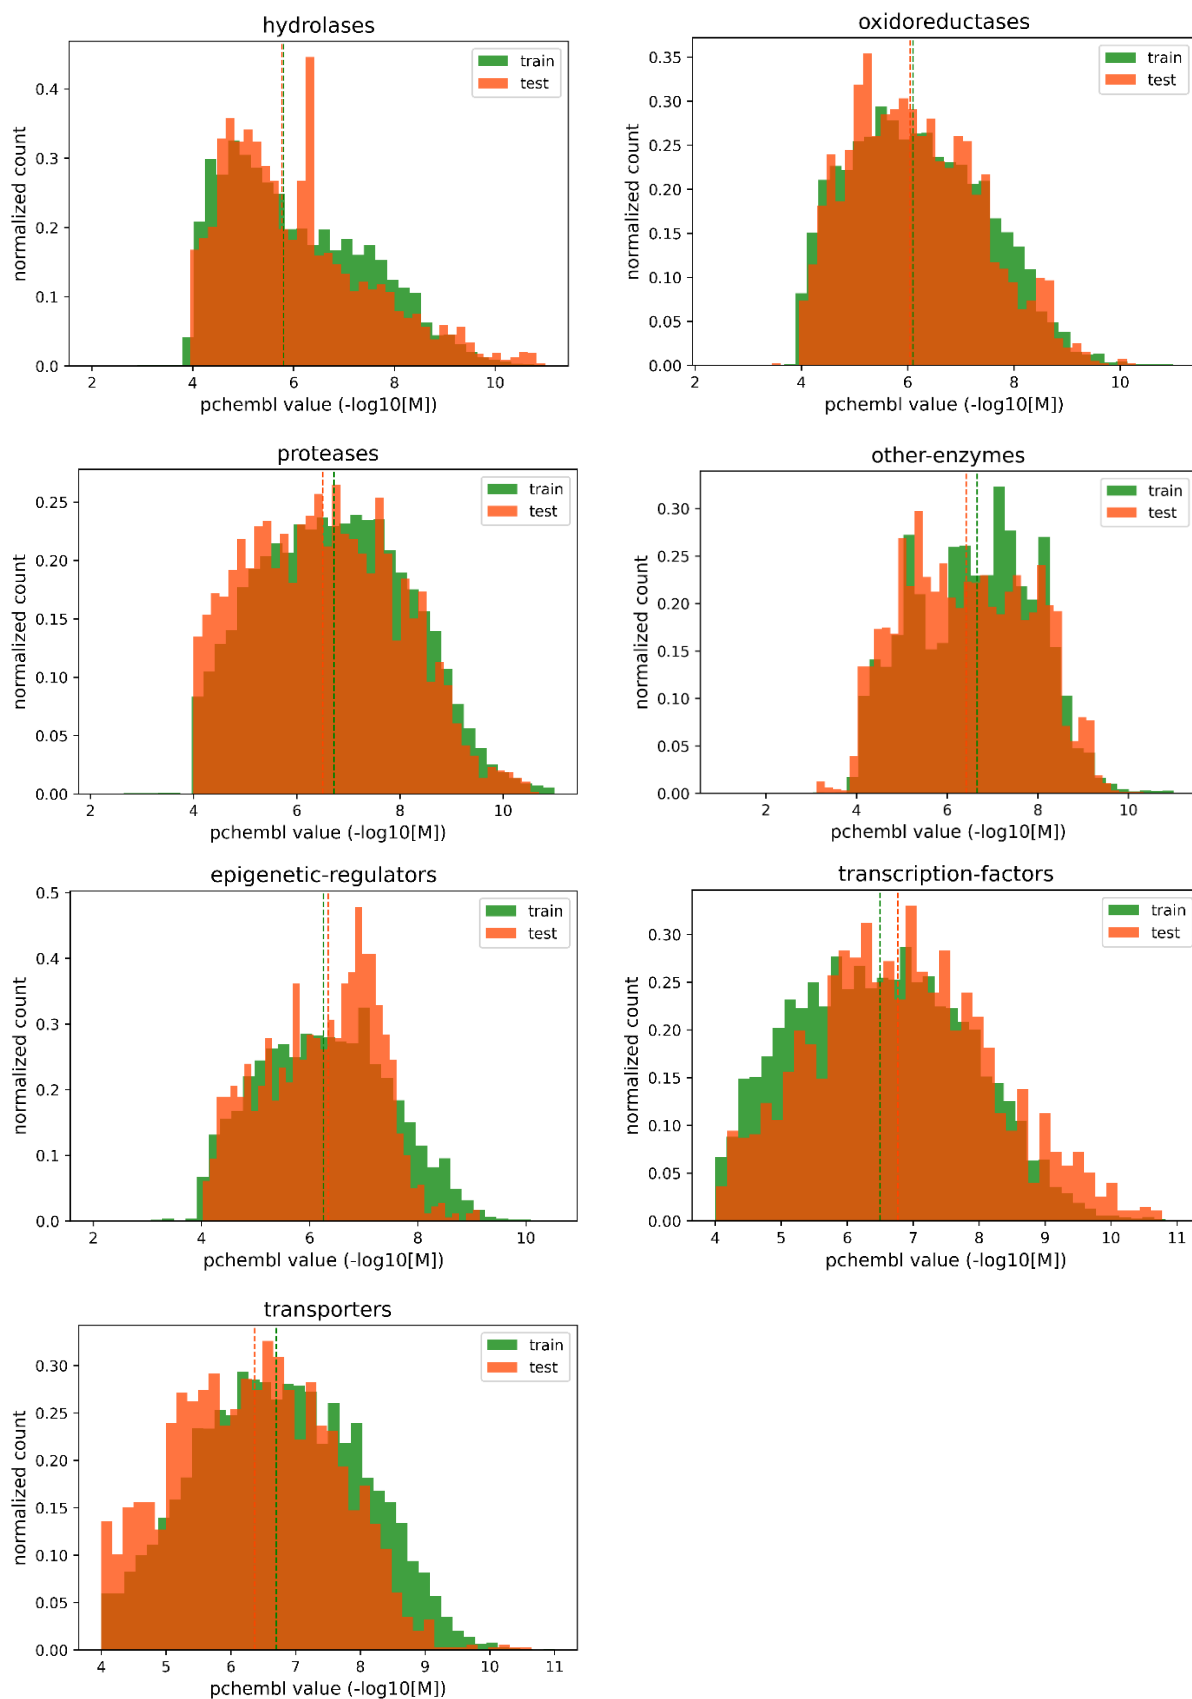

(c)

### Fully-dissimilar-split

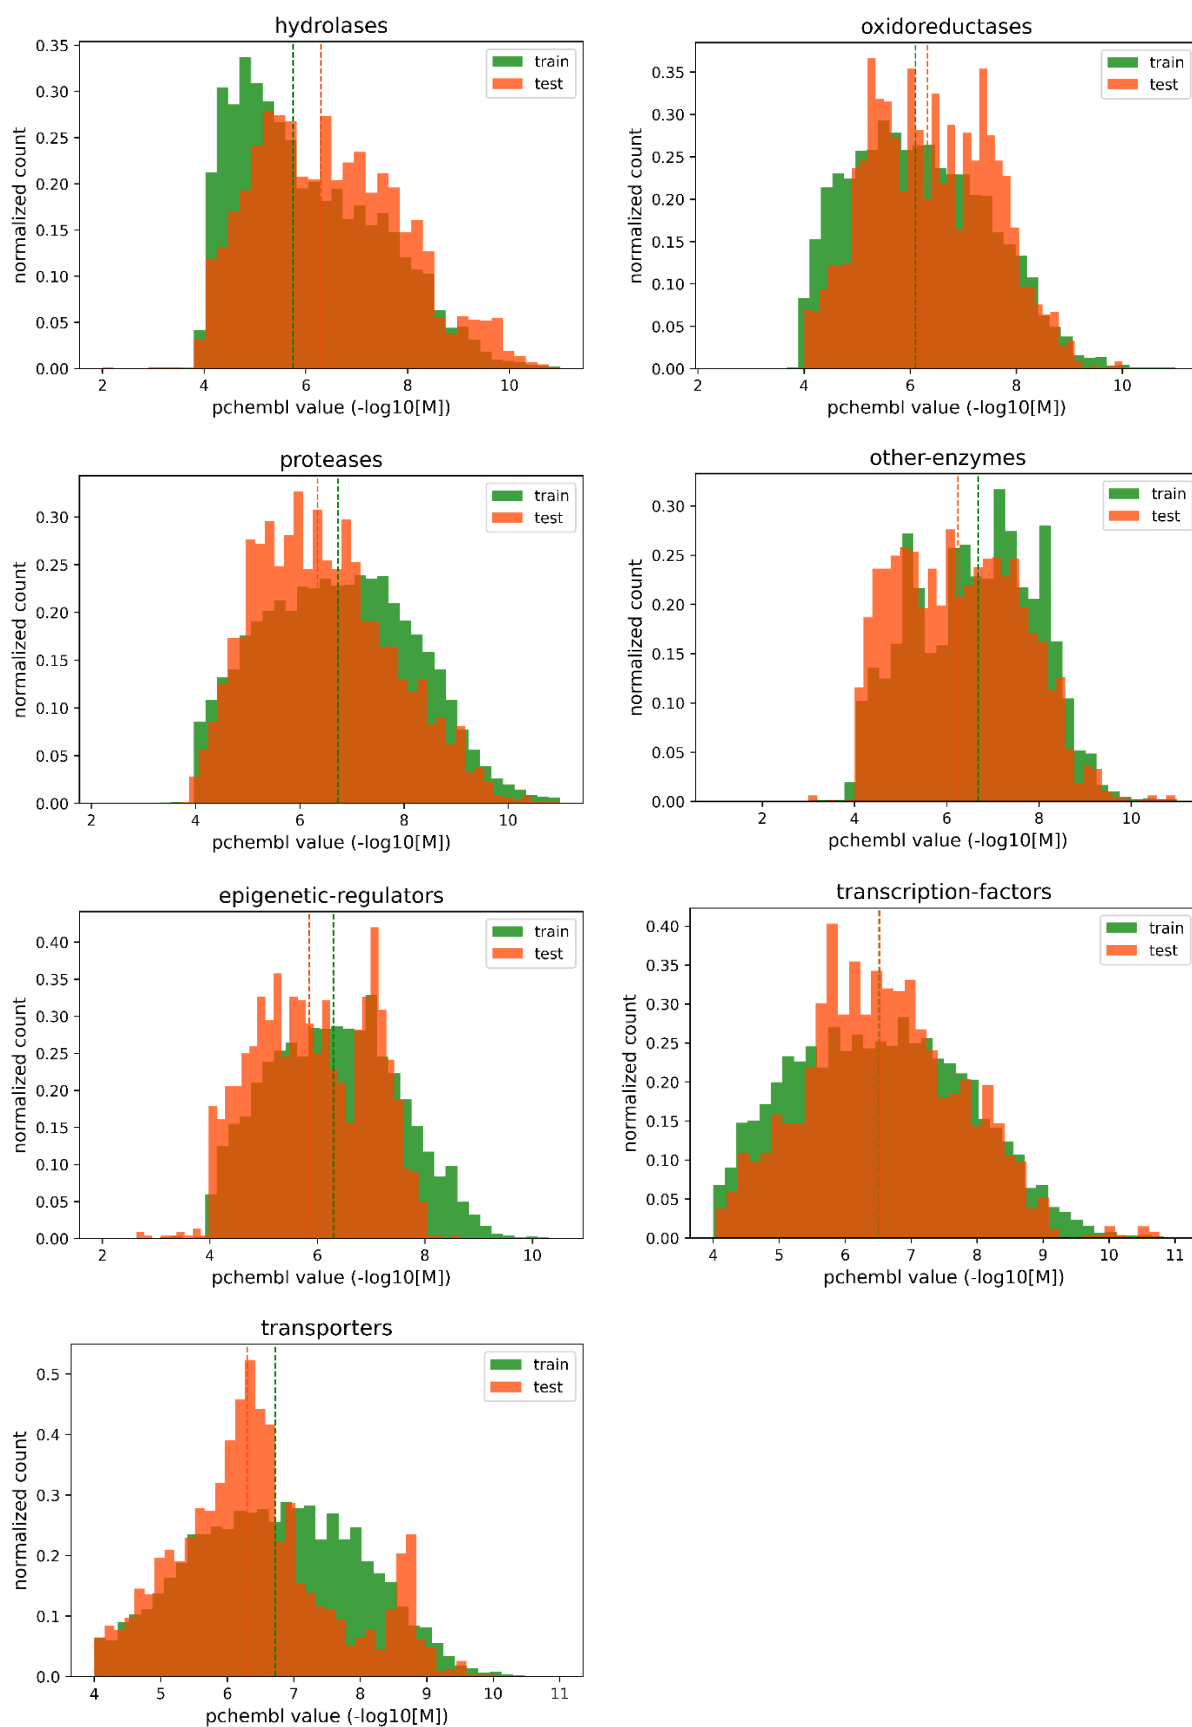

**Figure S2.** Bioactivity distributions of protein family-specific datasets in terms of; (a) random split, (b) dissimilar-compound split, and (c) fully-dissimilar split sets, together with the median values shown as vertical dashed lines.

(a)

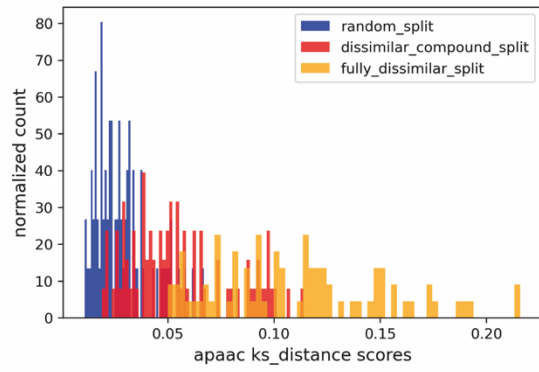

(b)

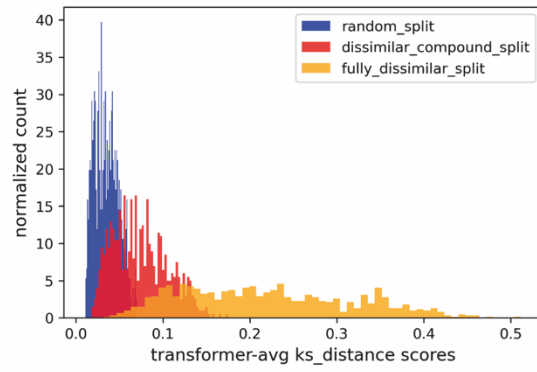

**Figure S3:** KS distance (between train and test samples) score distributions of (a) apaac, and (b) transformer-avg representations among random, dissimilar-compound, and fully-dissimilar splits in the transferases family proteins.

(a)

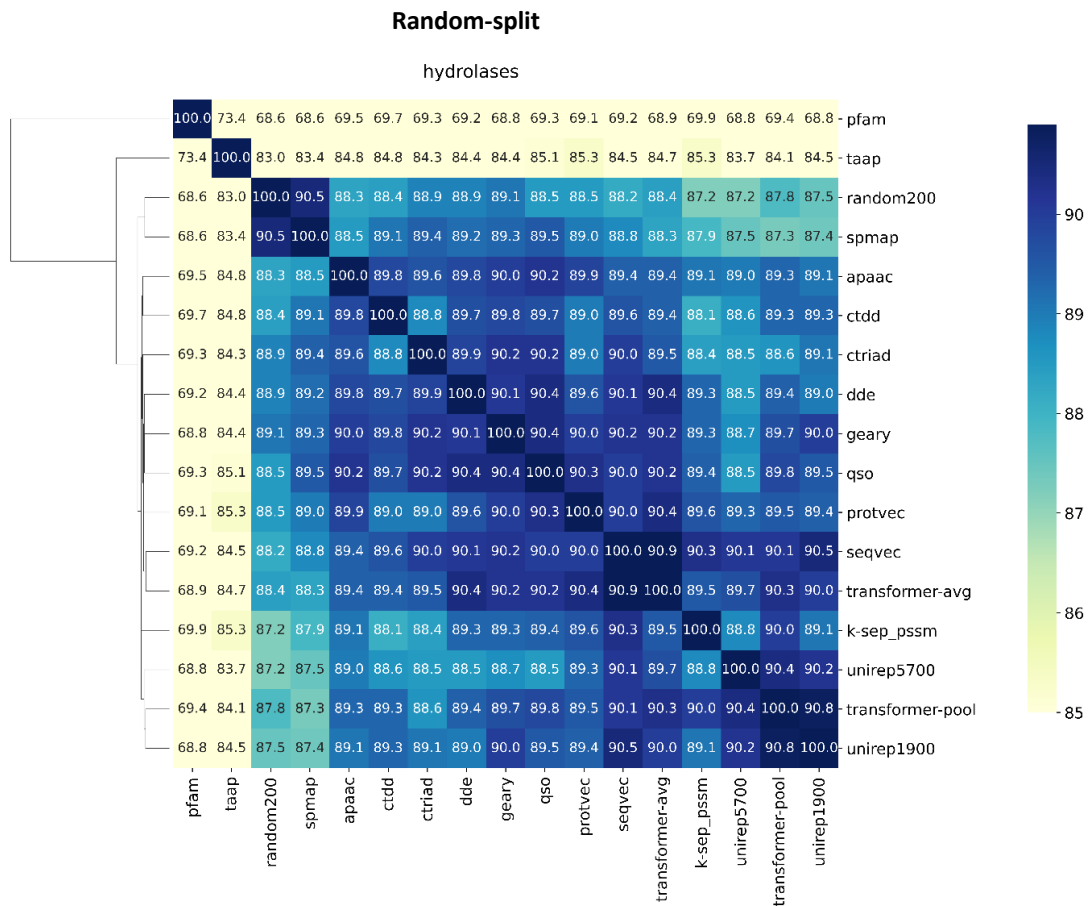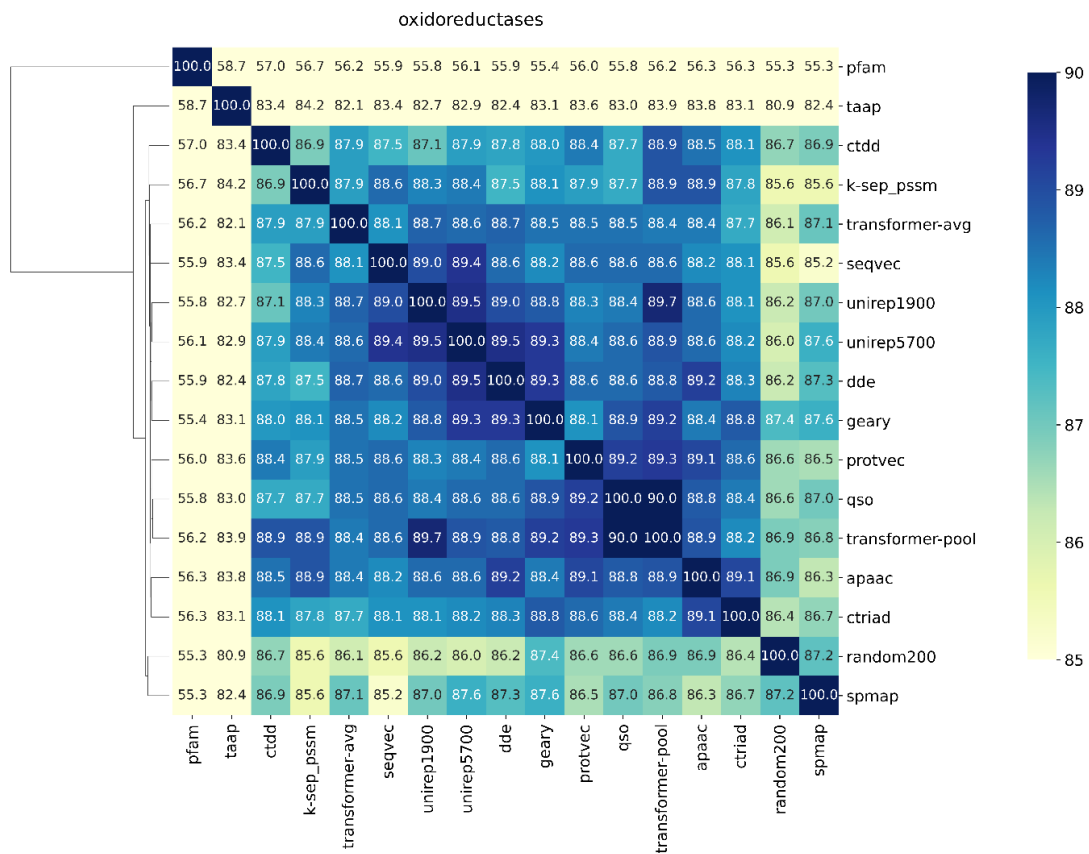

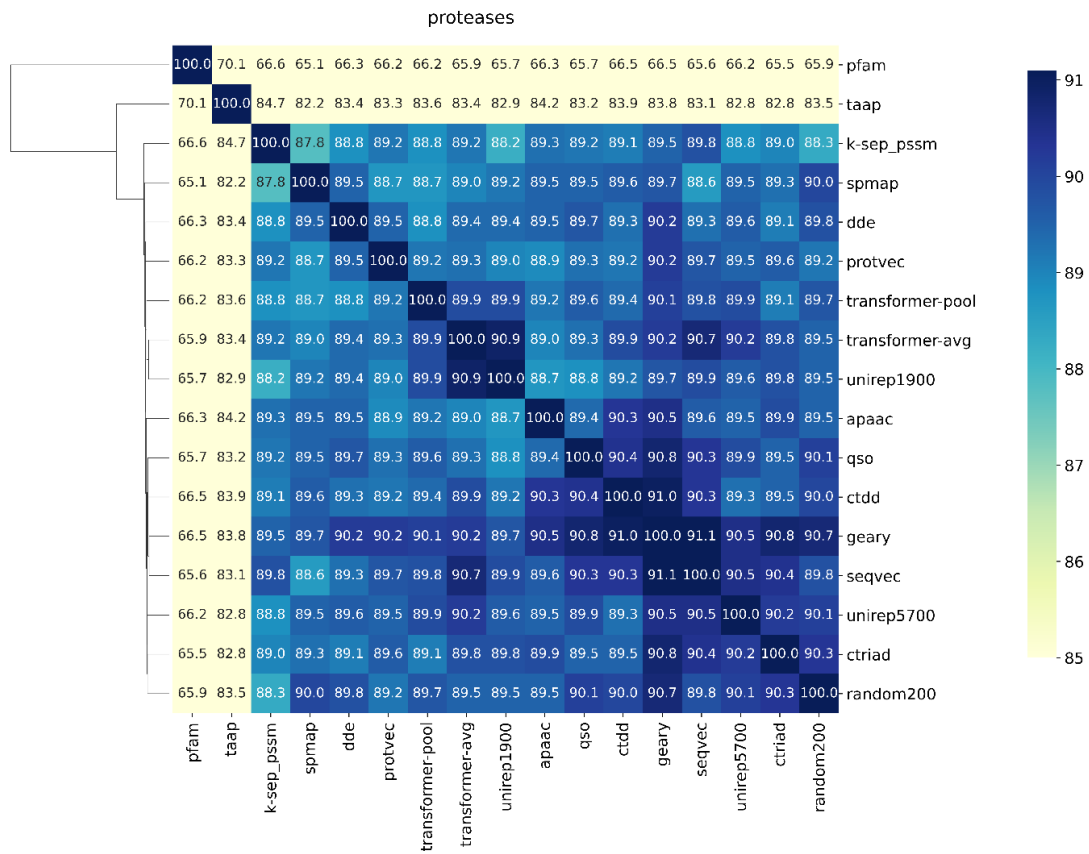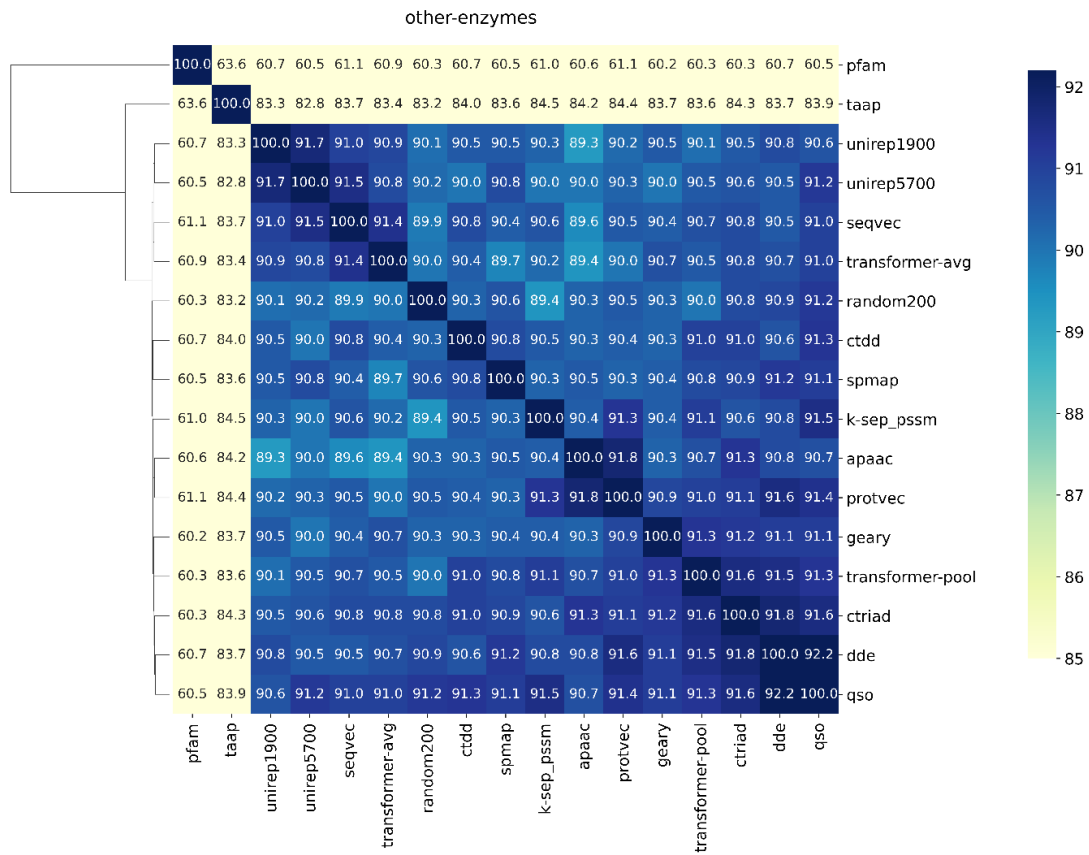

epigenetic-regulators

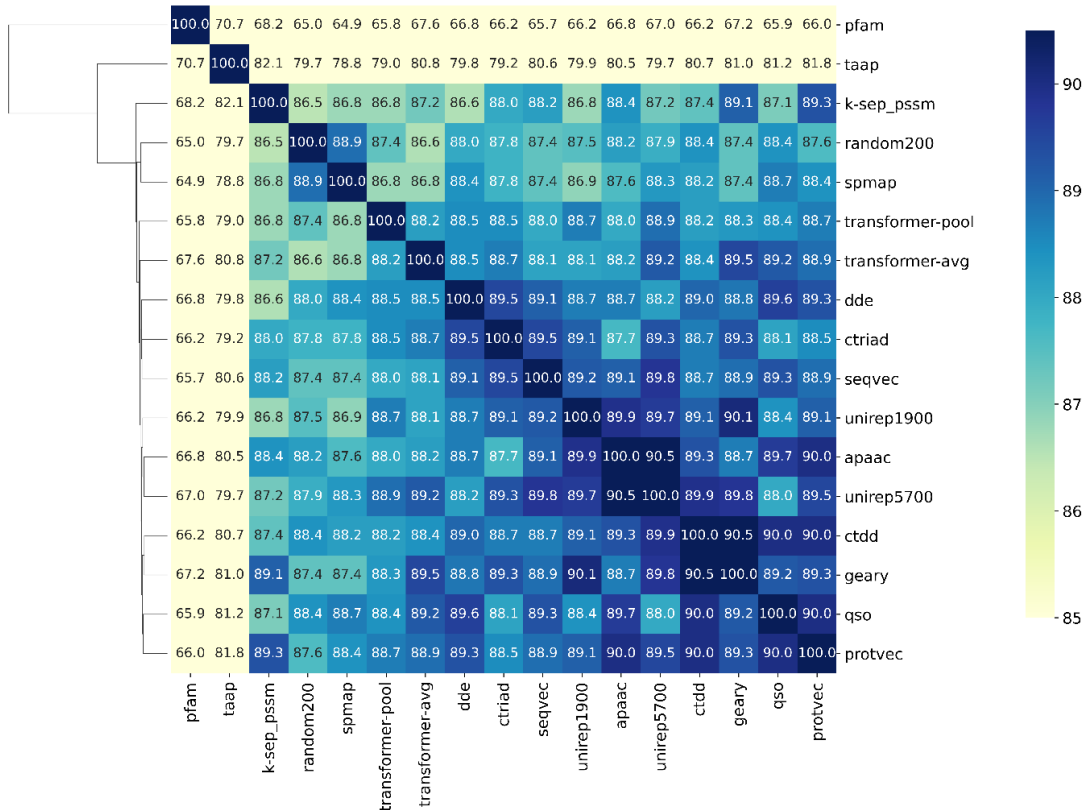

membrane-receptors

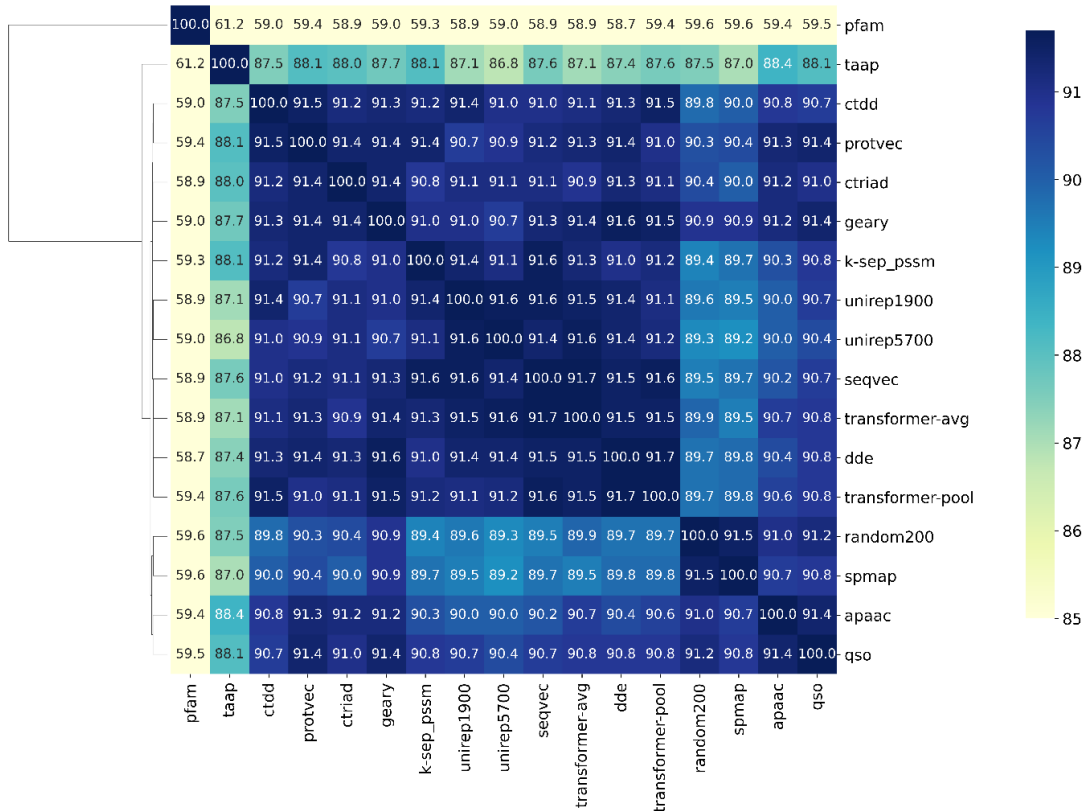



transcription-factors

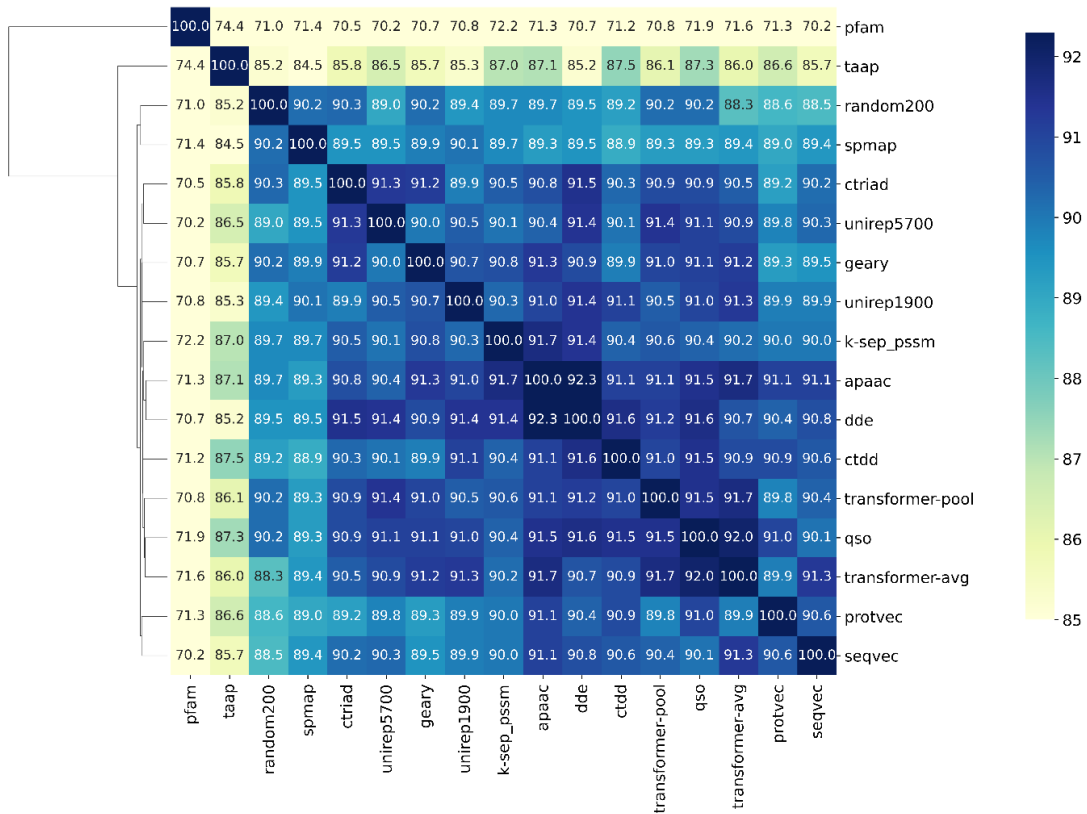

transporters

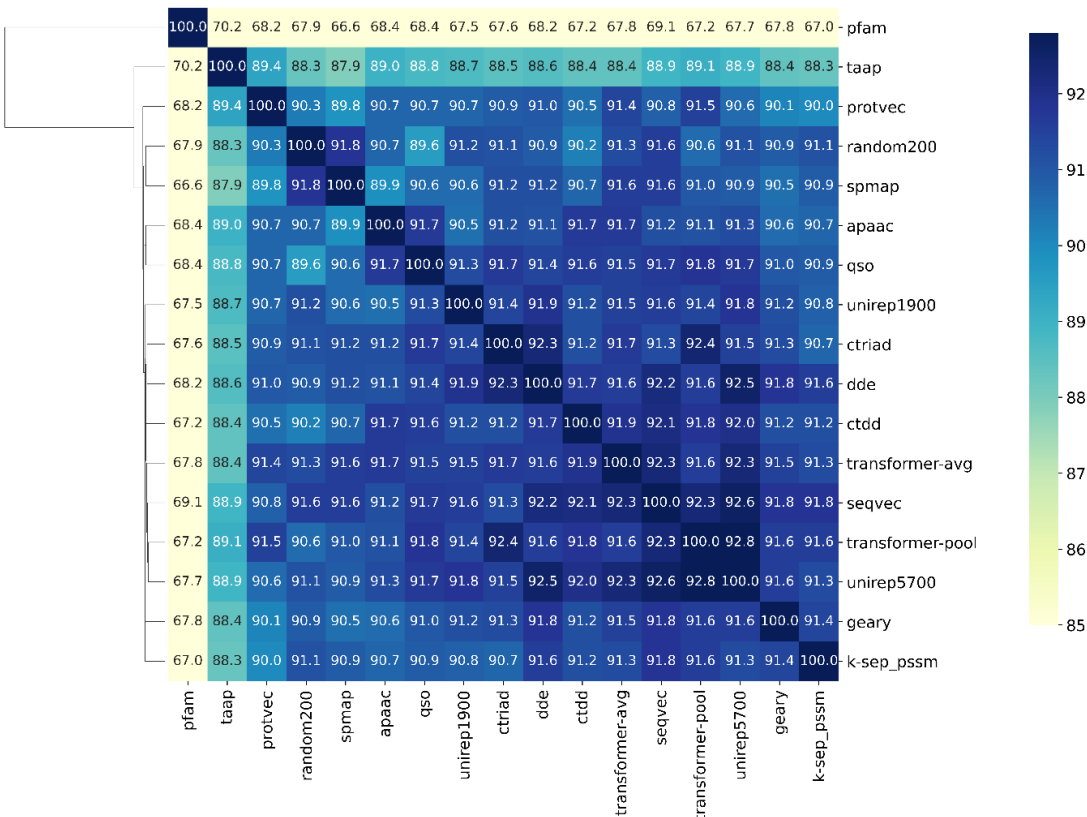

(b)

### Dissimilar-compound-split

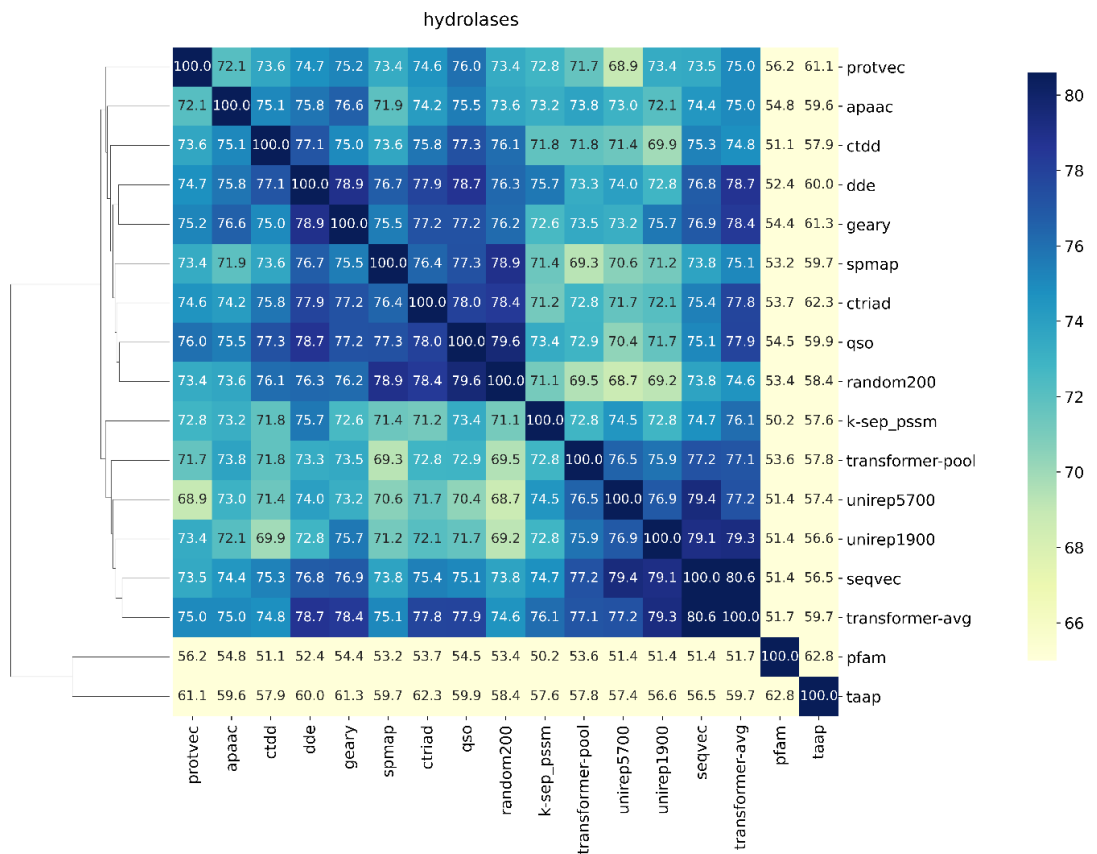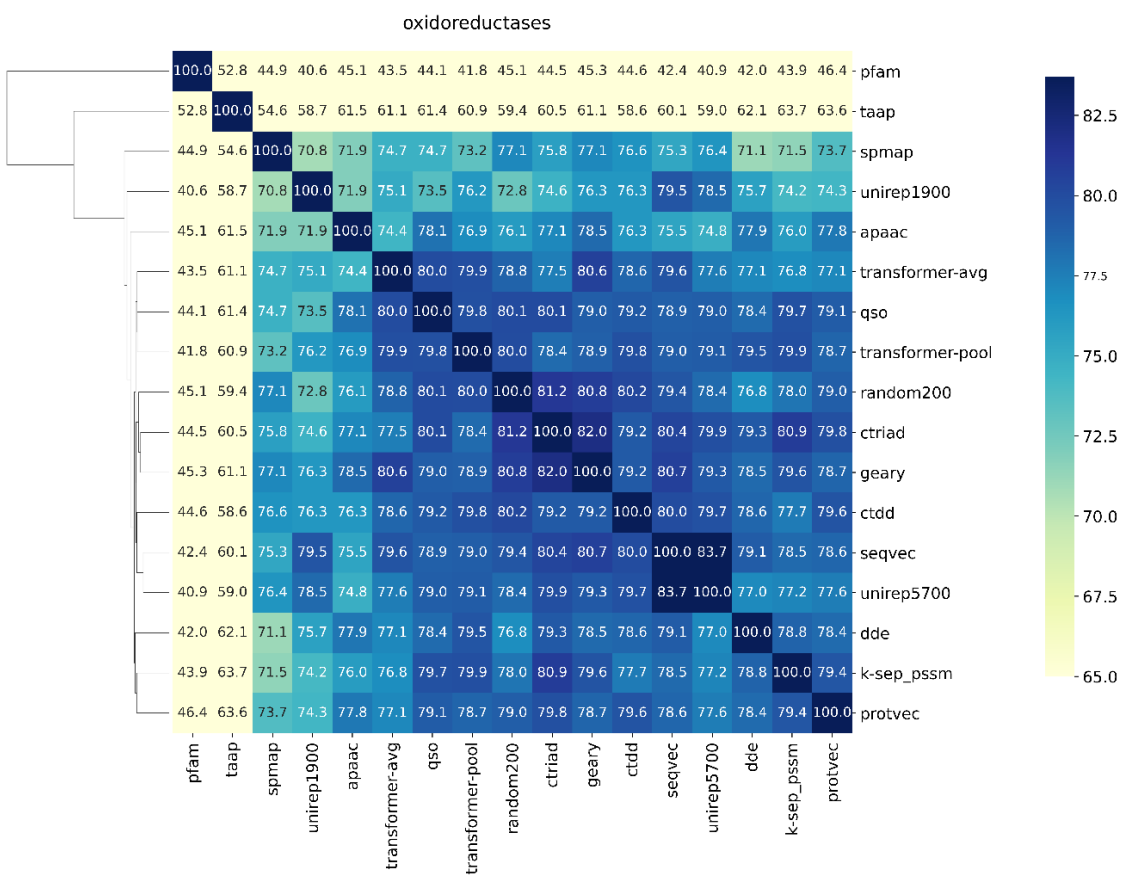

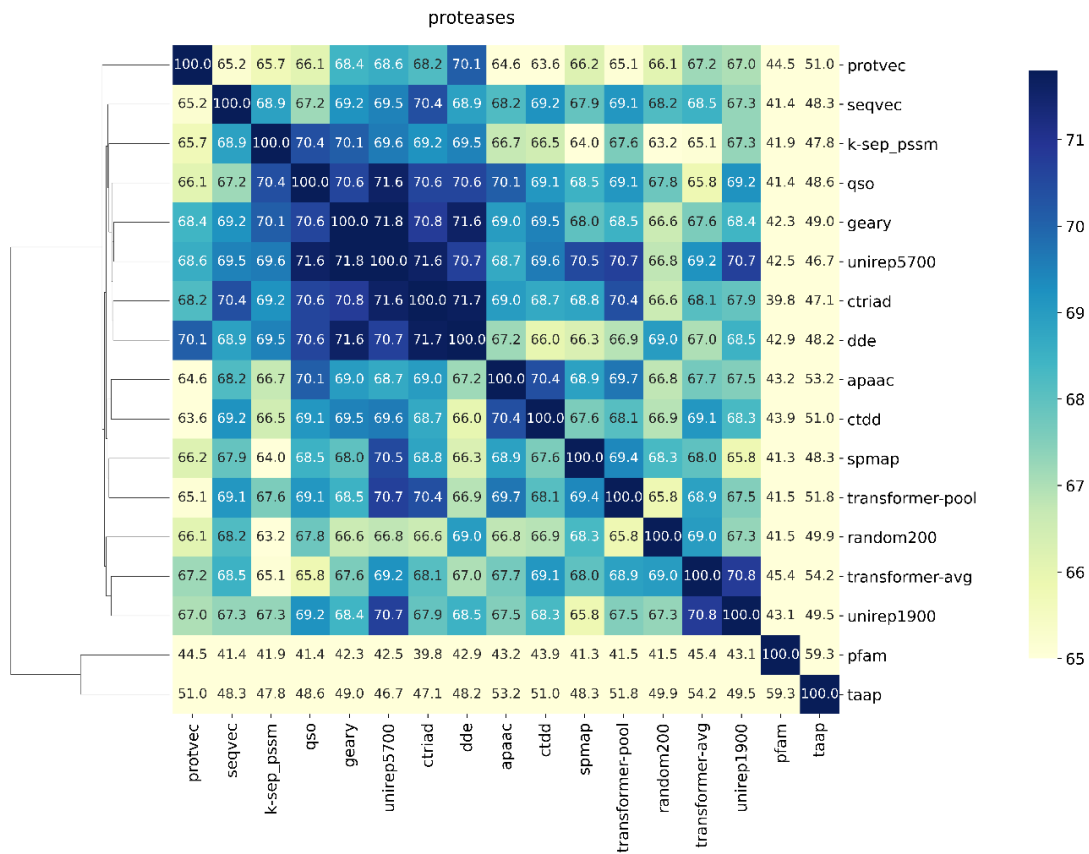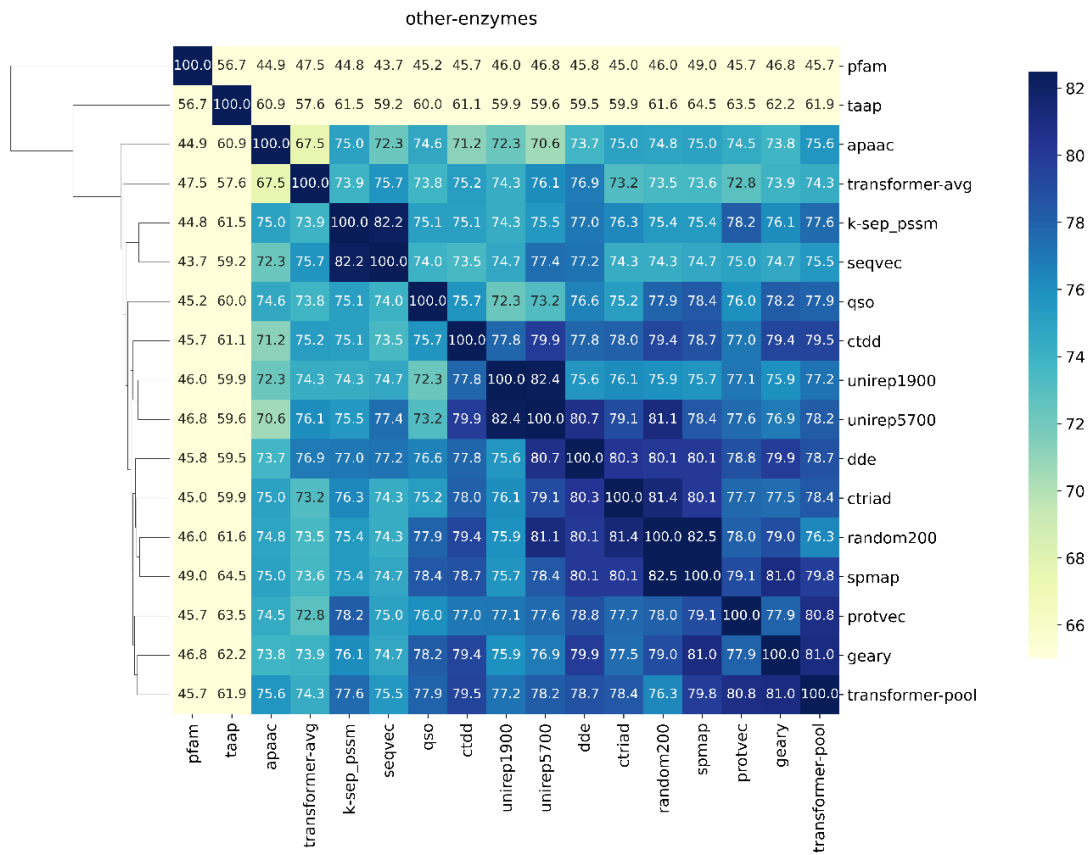

epigenetic-regulators

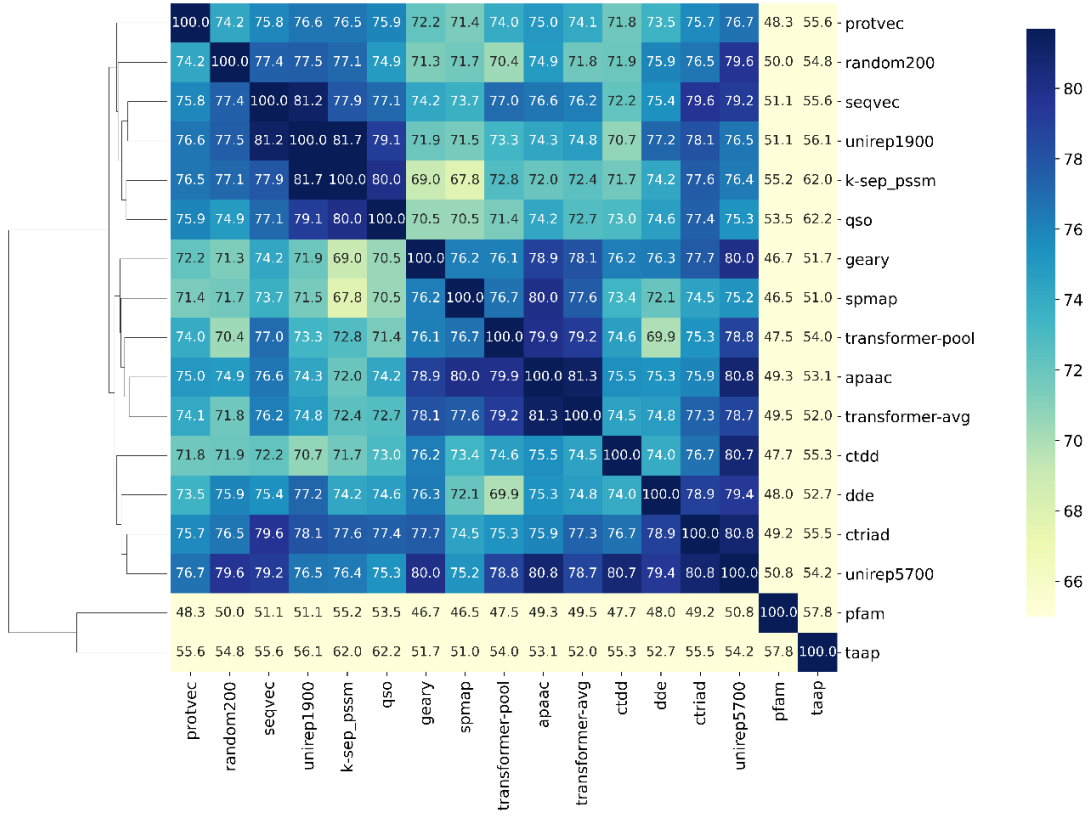

membrane-receptors

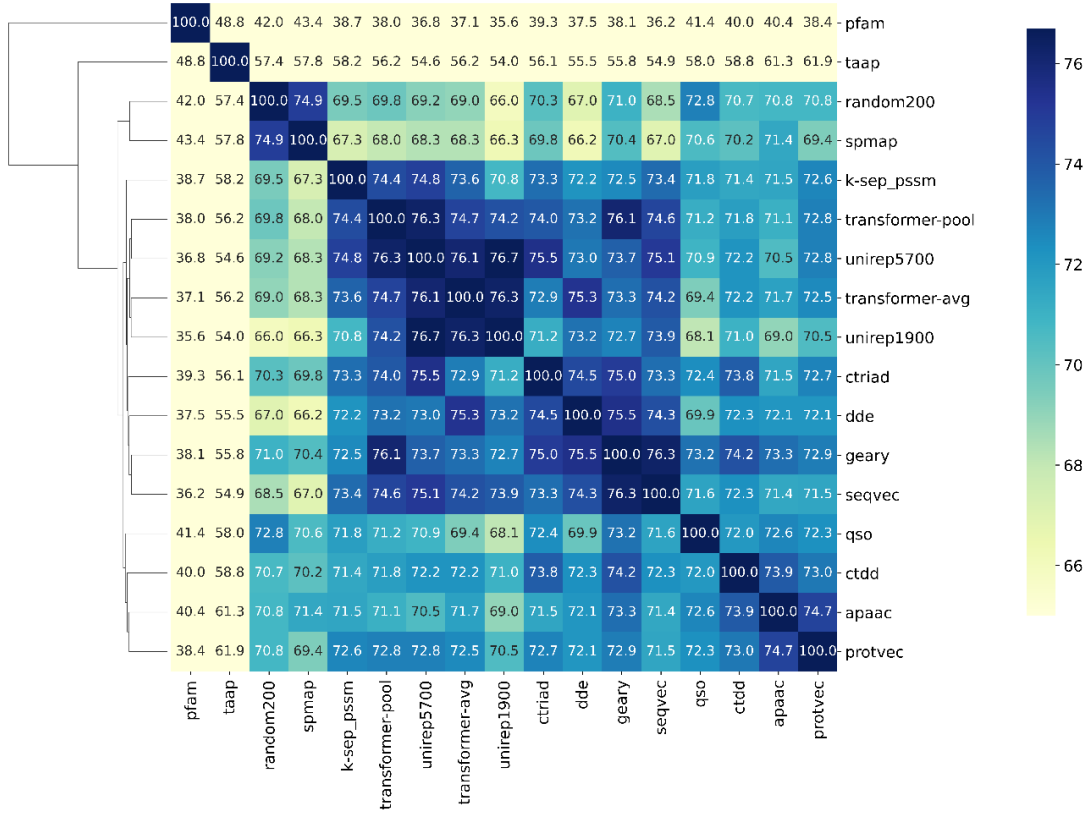

transcription-factors

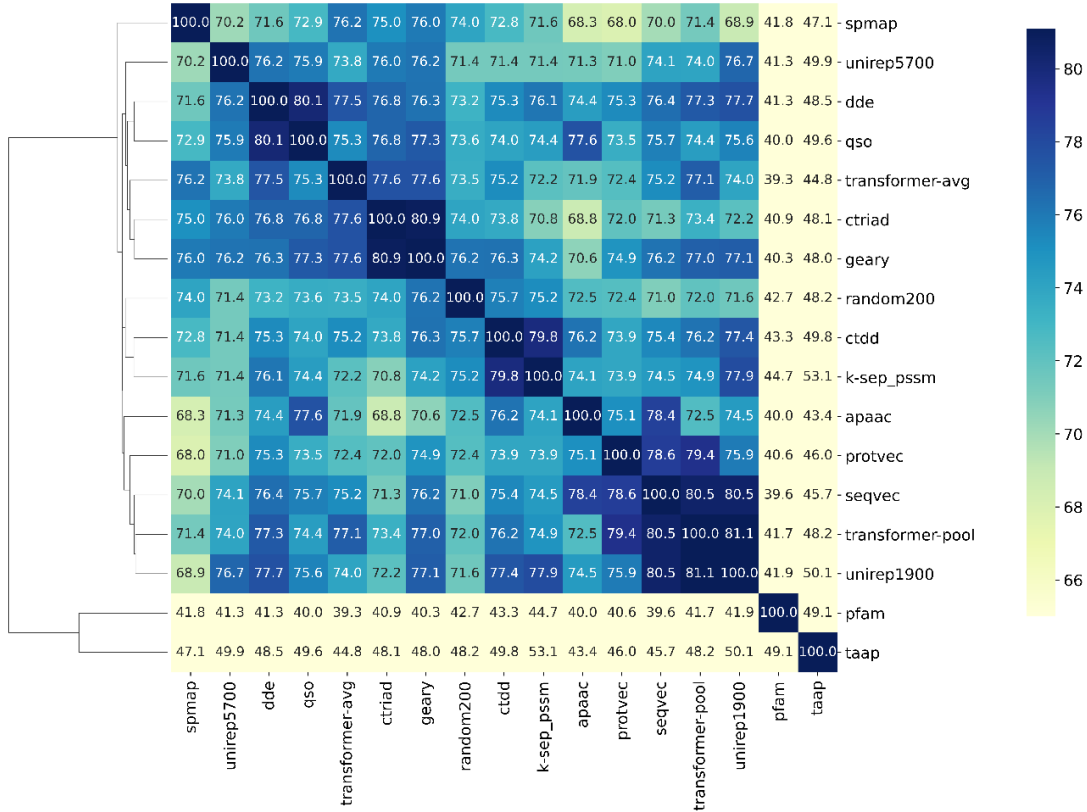

transporters

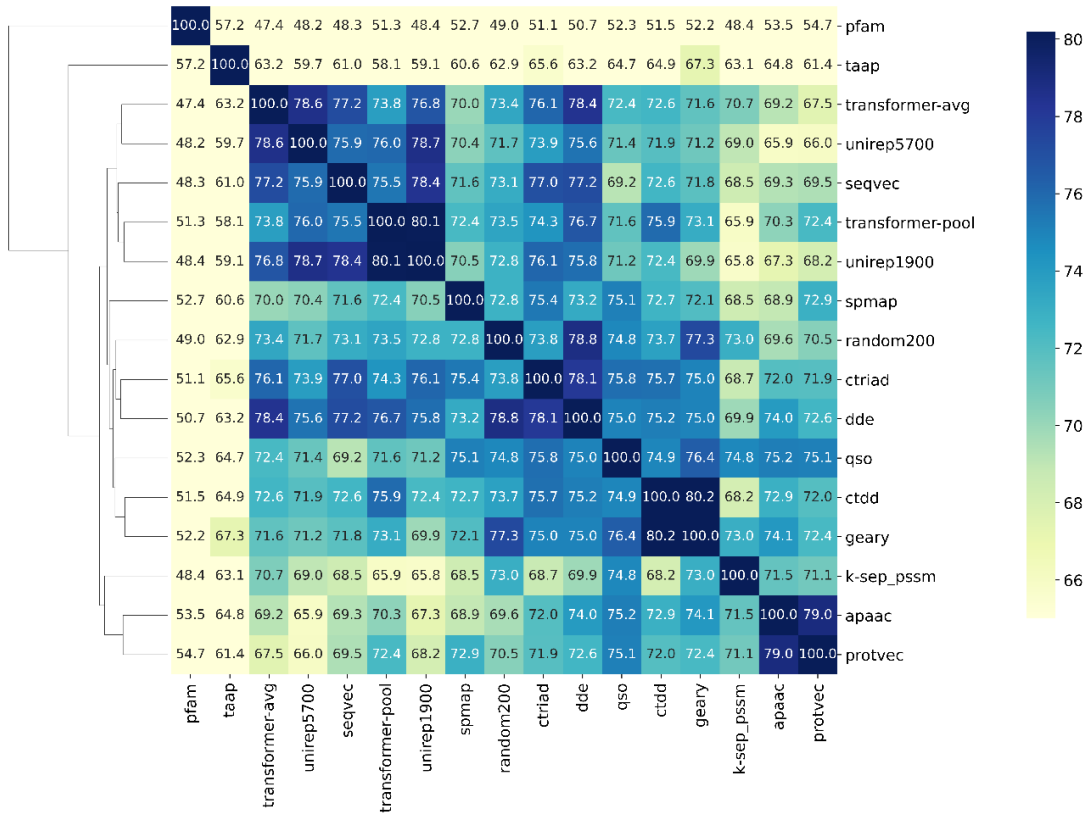

(c)

### Fully-dissimilar-split

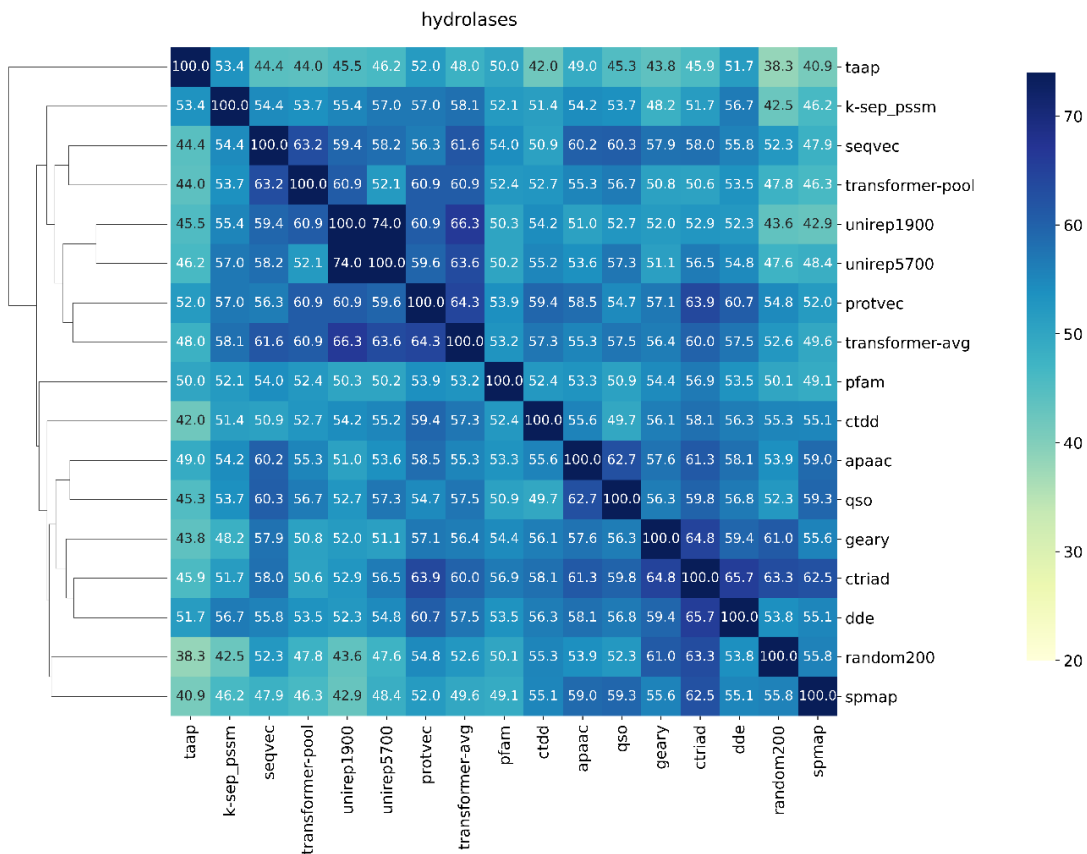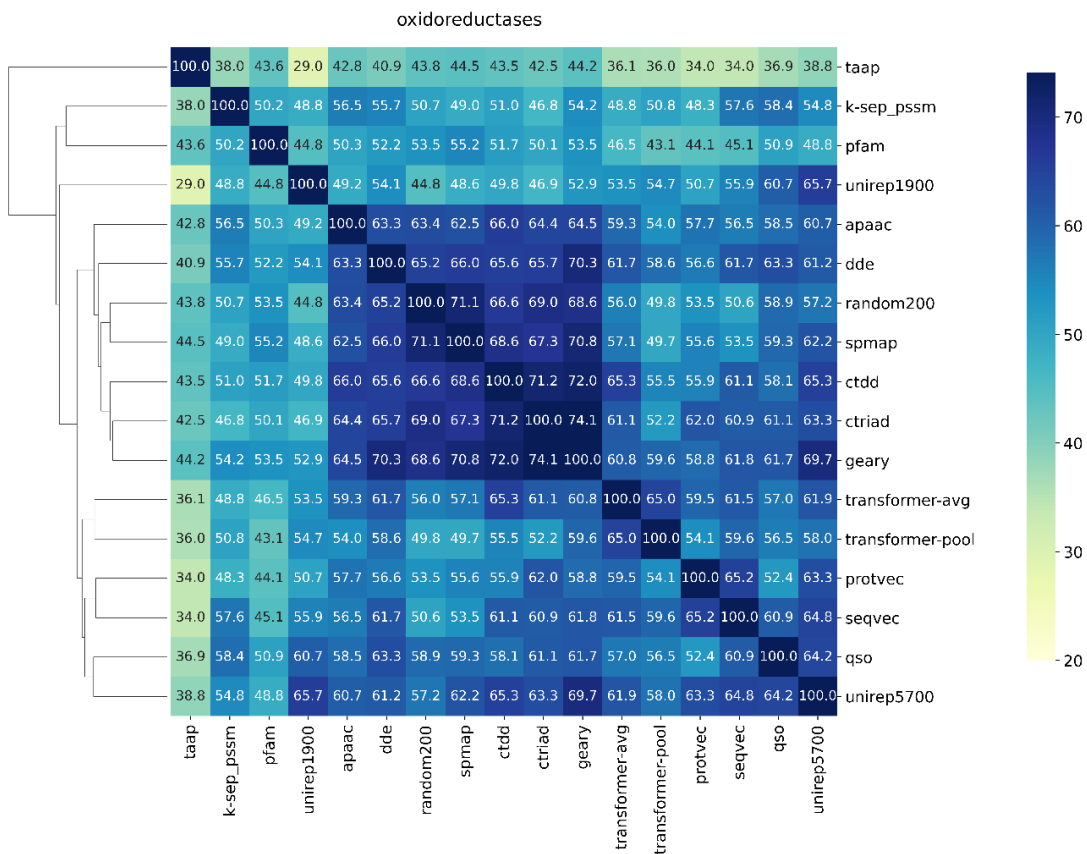

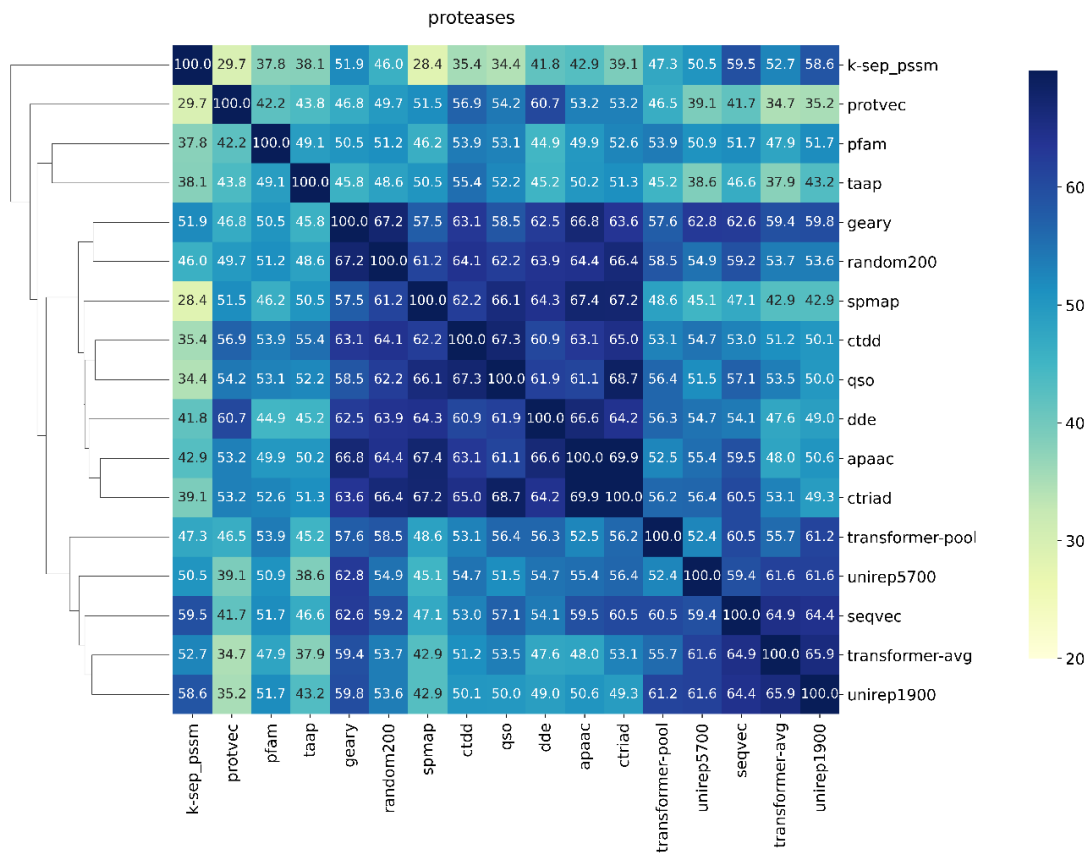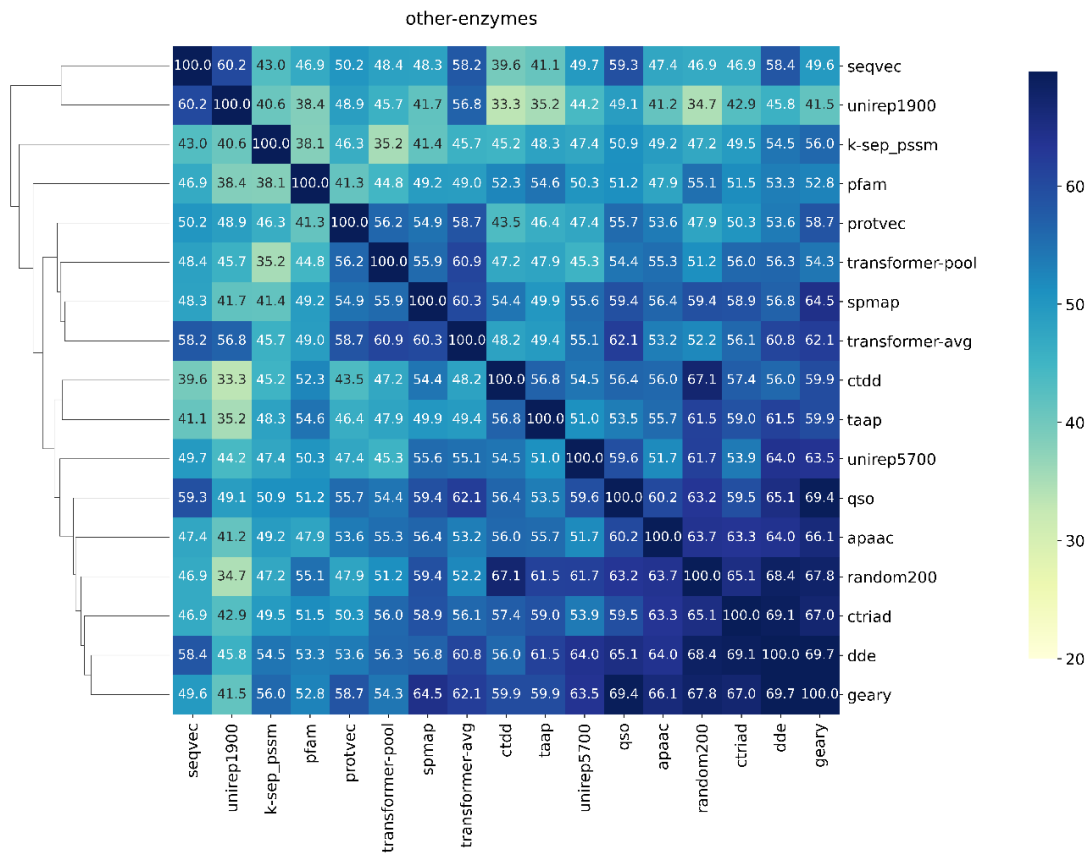

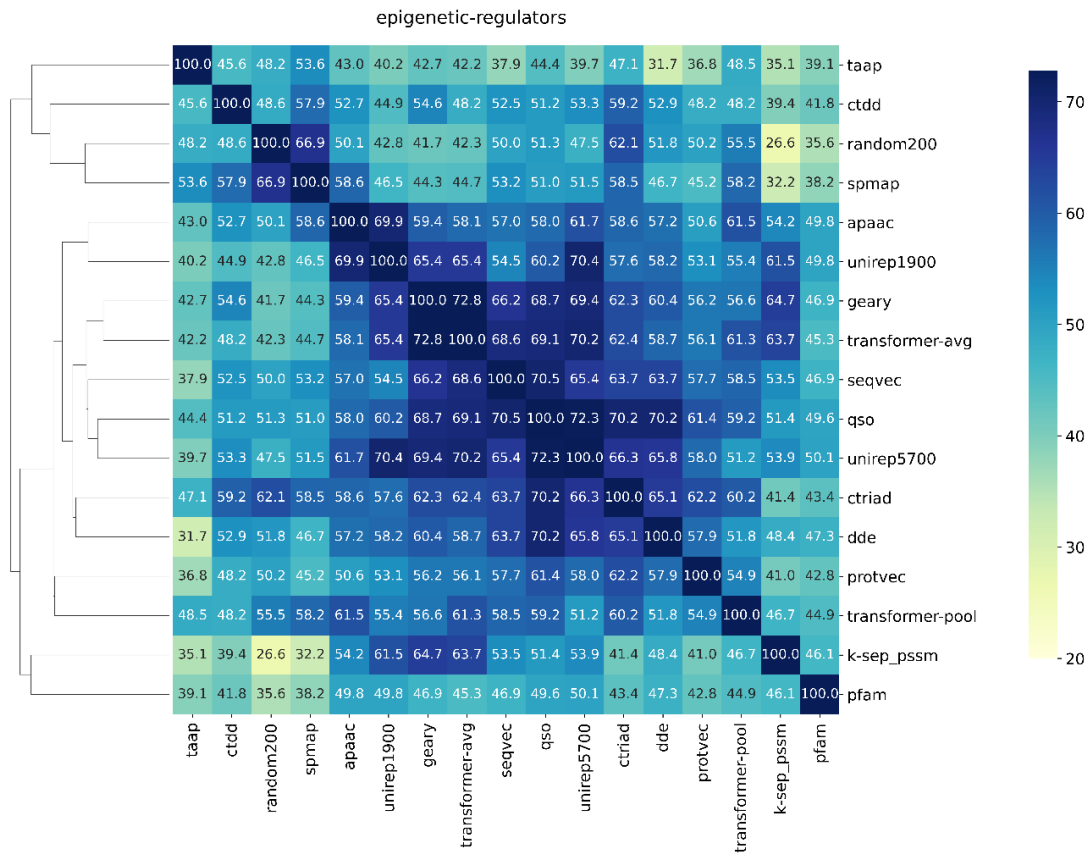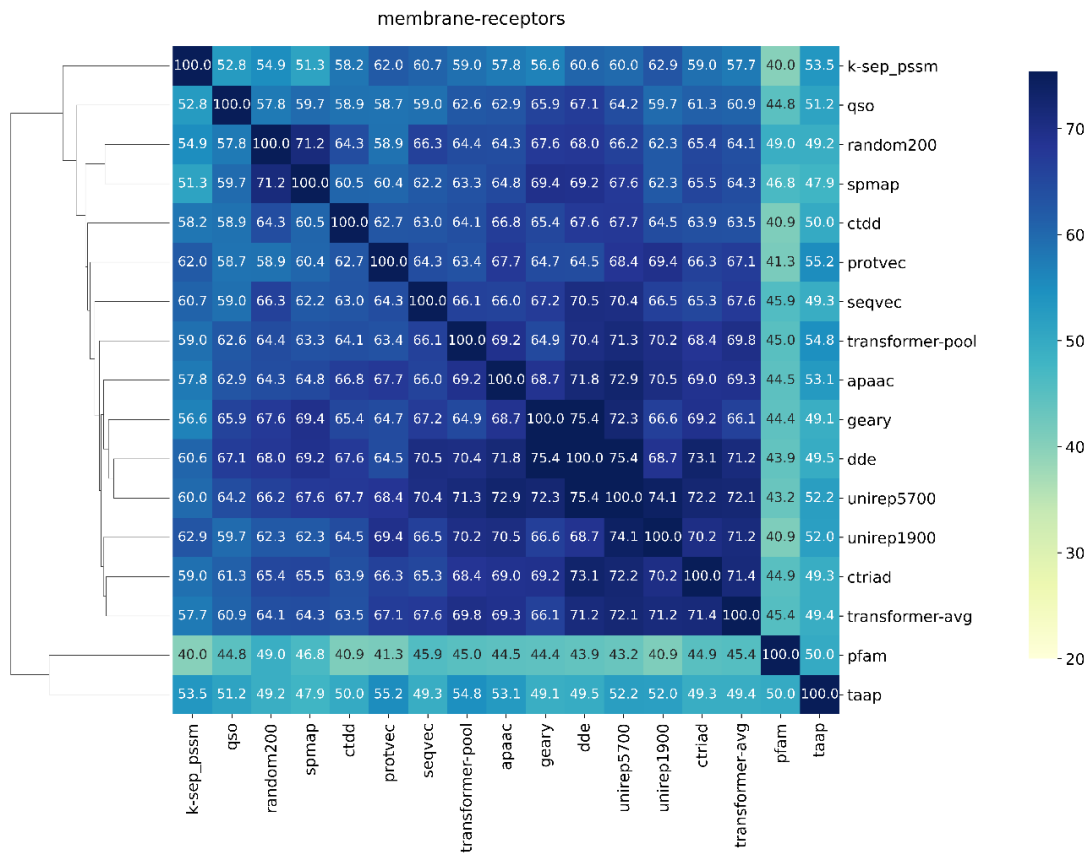



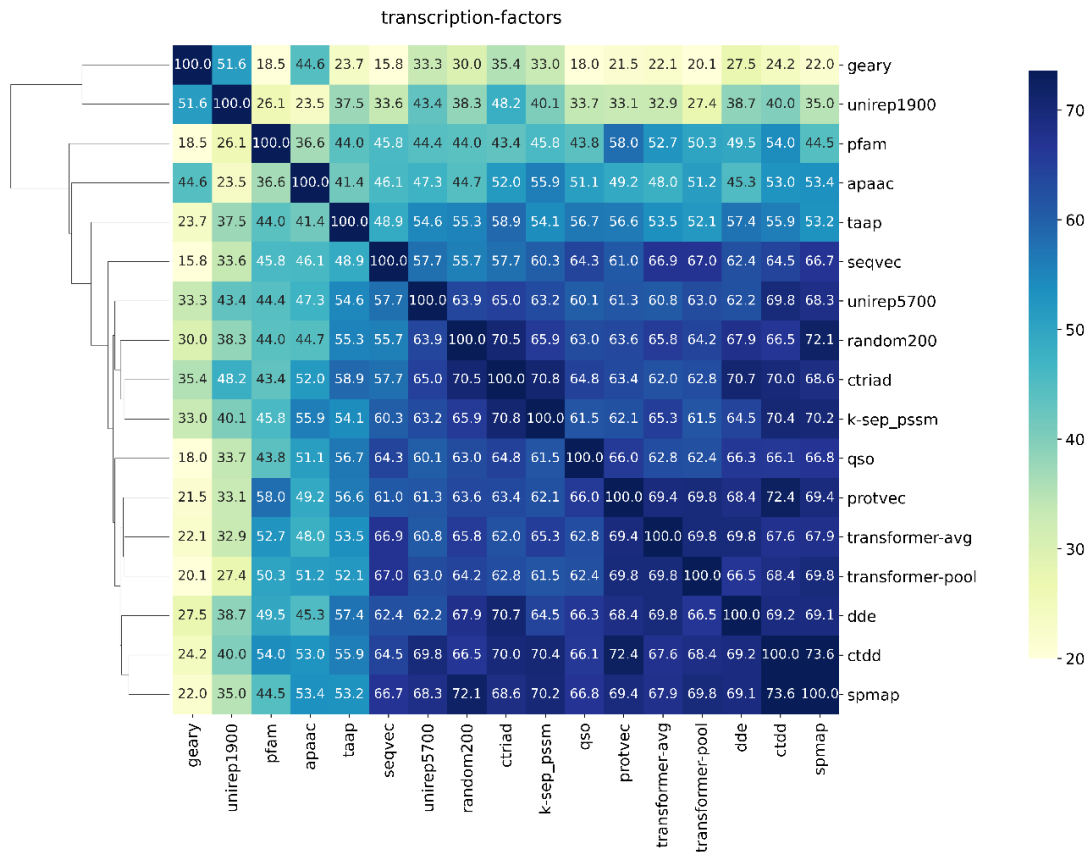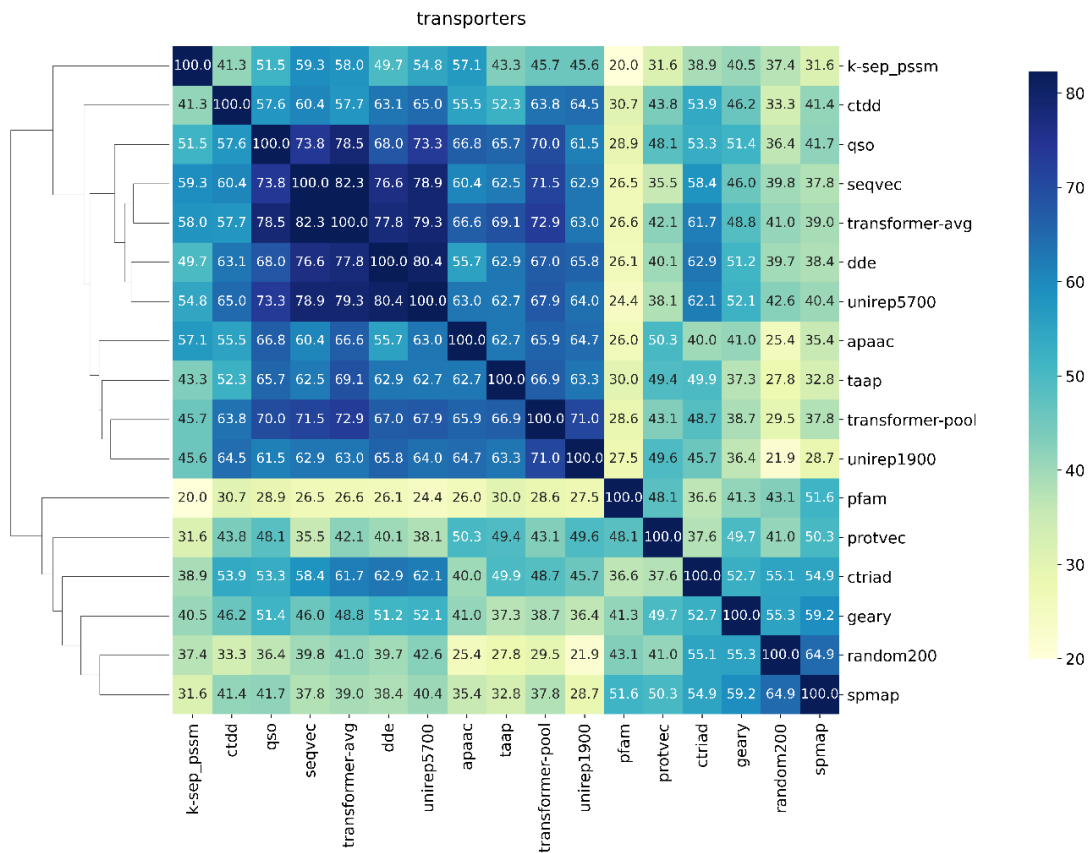

**Figure S4.** Clustered heatmaps of different protein representation approaches for protein families on (a) the random-split, (b) dissimilar-compound-split, and (c) fully-dissimilar-split datasets.
